# Supplementary material for: Catalyst-free photo-induced aerobic radical synthesis of lactams from N-alkenyl trichloroacetamides in 2-methyltetrahydrofuran as the radical initiator under violet light
Source: Royal Society of Chemistry journal article supplement (doi:10.1039/d3ob01804k), 2023-12-12

## Supporting Information

### Catalyst-free photo-induced aerobic radical synthesis of lactams from *N*-alkenyl trichloroacetamides in 2-methyl tetrahydrofuran as the radical initiator under violet light

Faïza Diaba\* and Gisela Trenchs

Laboratori de Química Orgànica, Facultat de Farmàcia, Universitat de Barcelona, Av.  
Joan XXIII 27-31, 08028-Barcelona, Spain

[faiza.diaba@ub.edu](mailto:faiza.diaba@ub.edu)

#### Table of contents

|                                                                                                       |     |
|-------------------------------------------------------------------------------------------------------|-----|
| 1. General information.....                                                                           | S2  |
| 2. Preparation and characterization of trichloroacetamides <b>1a-1s</b> .....                         | S3  |
| 3. Photocatalyzed synthesis of lactams <b>2</b> in the presence of ammonia.....                       | S5  |
| 4. Photocatalyzed synthesis of lactams <b>2</b> in THF or 2-MeTHF alone under violet irradiation..... | S7  |
| 5. Reactions achieved from <b>2e</b> and <i>epi-2e</i> .....                                          | S15 |
| 6. <sup>1</sup> H and <sup>13</sup> C NMR spectra of new compounds.....                               | S19 |

## 1. General information

Unless otherwise stated, all reactions were carried out under air atmosphere with commercially available solvents. Photocatalyzed reactions were carried out in a 10 mL flask closed with a rubber stopper using violet light ( $\lambda = 395\text{-}405\text{ nm}$ ). Reagents and solvents were used as received without further purification. All product mixtures were analyzed by thin-layer chromatography performed on  $\text{SiO}_2$  (Merck silica gel 60 F254) and the spots were located by UV light ( $\lambda 254\text{ nm}$ ) and/or a 1%  $\text{KMnO}_4$  aqueous solution. Flash chromatography was carried out on  $\text{SiO}_2$  (Carlo Erba silica gel 60A, 35–70  $\mu$ ). Drying of organic extracts during the reaction workup was performed over anhydrous  $\text{Na}_2\text{SO}_4$  and solvent evaporation was accomplished with a rotatory evaporator.  $^1\text{H}$  and  $^{13}\text{C}$  NMR spectra were recorded on a Bruker 400 and a Bruker 500 spectrometers in  $\text{CDCl}_3$ . Chemical shifts are reported as  $\delta$  values (ppm) relative to internal  $\text{Me}_4\text{Si}$ ,  $^{13}\text{C}$  NMR spectra are referenced to the deuterated solvent signal ( $\text{CDCl}_3$ : 77.00 ppm). All NMR data assignments are supported by COSY and HSQC experiments. The following abbreviations (or combinations) were used to describe  $^1\text{H}$ -NMR multiplicities: s = singlet, d = doublet, t = triplet, q = quartet, m = multiplet, br = broad. Infrared spectra were recorded on a Nicolet 320 FT-IR spectrophotometer. Melting points were recorded on a Gallenkamp melting point apparatus. Electrochemical characterizations (Cyclic Voltammetry) were carried out in acetonitrile (MeCN)/0.1 M tetrabutylammonium hexafluorophosphate (98%) at room temperature, on a BASi Epsilon EClipse<sup>TM</sup> (Metrohm, The Netherlands) in a glass cell. A three-electrode cell was employed, which was composed of a glassy carbon (GC) working electrode (3 mm diameter), a platinum wire as a counter electrode and an Ag/AgCl as a reference electrode (RE). Oxygen was removed by purging the solution with high purity Nitrogen. The GC electrode was polished before any measurement with diamon paste and ultrasonically rinsed with deionized water for 15 minutes. The electrode was electrochemically activated in the background solution by means of several voltammetric cycles at 100 mV/s between the anodic and cathodic solvent /electrolyte discharges.<sup>1</sup> UV-Visible absorbances spectra were recorded with Secomam UVIKON XS UV/Vis Spectrometer.

---

<sup>1</sup> We thank Dr. Xavier Companyó for letting us use the machine and Paula Rodríguez for her help.

## 2. Preparation and characterization of trichloroacetamides 1a-1s

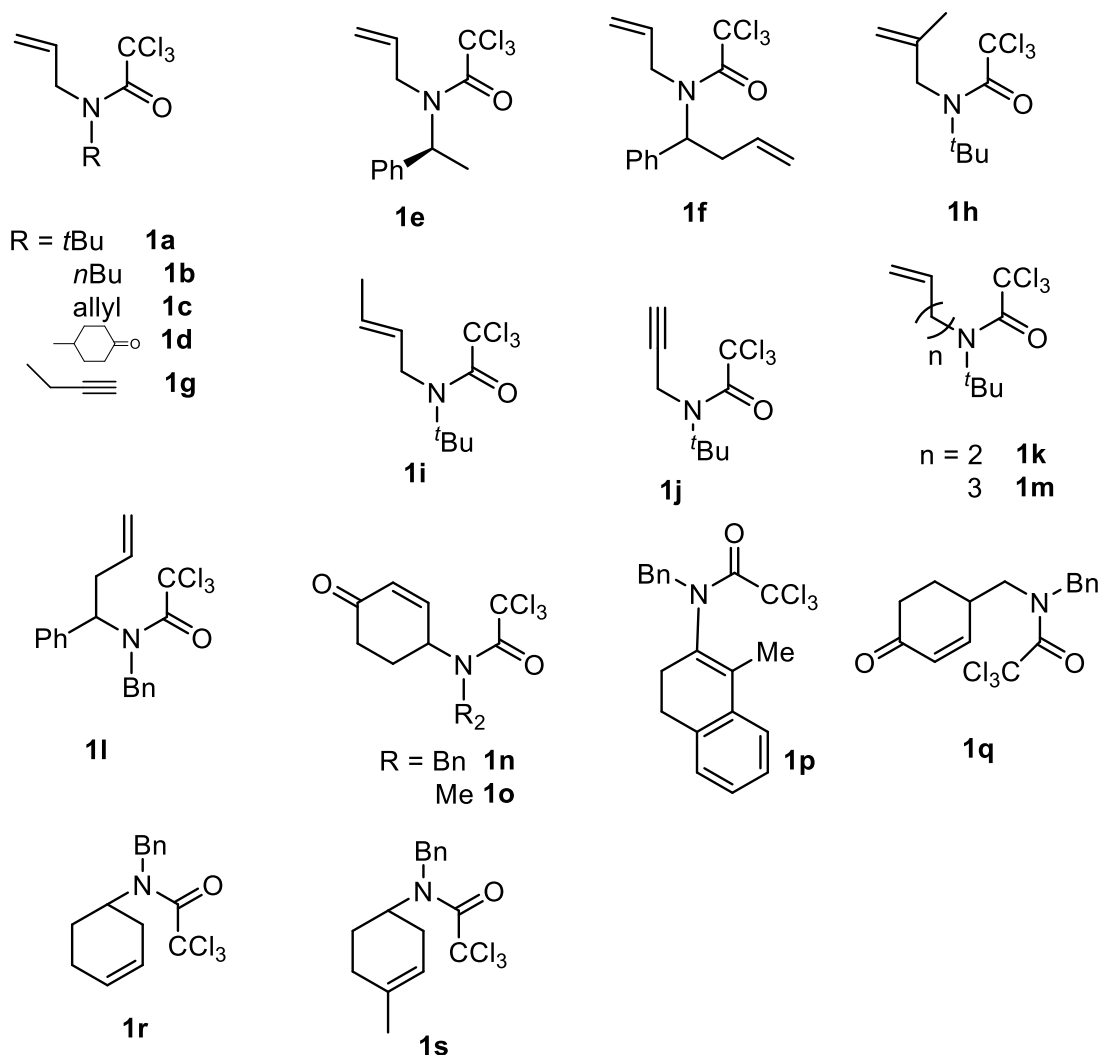

For the preparation and characterization of trichloroacetamides **1a**, **1b**, **1c**, **1d**, **1g**, **1h**, **1i**, **1k**, **1m**, **1n** see our previous work.<sup>2</sup> Preparation and characterization of **1e** has been reported previously.<sup>3</sup> **1j** was prepared from *t*-butylamine and propargyl bromide using the two-step sequence described in ref.2. Synthesis and characterization of **1f** and **1s** is reported in our previous work.<sup>4</sup> **1l** was prepared from the corresponding secondary amine<sup>5</sup> and trichloroacetyl chloride using the conditions reported in ref.2. **1o** and **1q** were prepared by oxidation with IBX of the corresponding amides<sup>6</sup> using the protocol

<sup>2</sup> G. Trenchs, F. Diaba, *Org. Biomol. Chem.*, 2022, **20**, 3118-3123.

<sup>3</sup> M. L. Marin, R. J. Zaragoza, M. A. Miranda, F. Diaba, J. Bonjoch, *Org. Biomol. Chem.*, 2011, **9**, 3180-3187.

<sup>4</sup> F. Diaba, E. Gomez-Bengoa, J. M. Cuerva, J. Bonjoch, J. Justicia, *RSC Adv.*, 2016, **6**, 55360-55365.

<sup>5</sup> S. Rodriguez, E. Castillo, M Carda, J. A. Marco, *Tetrahedron*, 2002, **58**, 1185-1192.

<sup>6</sup> F. Diaba, J. A. Montiel, G. Serban, J. Bonjoch, *Org. Lett.*, 2015, **17**, 3860-3863.

described previously.<sup>2</sup> Finally, the preparation and characterization of **1r** and **1p** were reported in our previous work.<sup>7,8</sup>

#### ***N*-(*tert*-Butyl)-2,2,2-trichloro-*N*-(prop-2-yn-1-yl)acetamide (**1j**)**

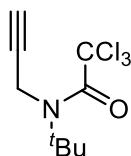

Physical State: colorless oil

<sup>1</sup>H NMR (400 MHz, CDCl<sub>3</sub>) δ 4.53 (br s, 2H), 2.37 (t, *J* = 2.4 Hz, 1H), 1.58 (s, 9H, tBu); <sup>13</sup>C NMR (101 MHz, CDCl<sub>3</sub>) δ 159.6 (C=O), 94.7 (CCl<sub>3</sub>), 80.2 (C), 73.3 (CH), 61.4 (C), 36.9 (CH<sub>2</sub>), 27.8 (CH<sub>3</sub>); IR (NaCl) 2975, 2930, 2122, 1686 cm<sup>-1</sup>; HRMS (ESI-TOF) calcd. for C<sub>9</sub>H<sub>13</sub>Cl<sub>3</sub>NO 256.0057 [M+H]<sup>+</sup>, found 256.0055. Calcd. for C<sub>9</sub>H<sub>16</sub>Cl<sub>3</sub>N<sub>2</sub>O 273.0323 [M+NH<sub>4</sub>]<sup>+</sup>, found 273.0323.

#### ***N*-Benzyl-2,2,2-trichloro-*N*-(1-phenylbut-3-en-1-yl)acetamide (**1l**)**

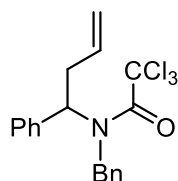

Physical State: colorless oil

<sup>1</sup>H NMR (400 MHz, CDCl<sub>3</sub>) δ 3.02-2.64 (m, 2H), 4.12 and 5.12-4.64 (m, 5H), 5.91 and 5.68 (2 br s, 1H), 7.61-6.94 (m, 10H); <sup>13</sup>C NMR (101 MHz, CDCl<sub>3</sub>) δ 160.8 (C=O), 137.8, 137.0, 135.6 (C), 134.6, 133.7 (CH), 128.7, 128.4, 128.2, 127.9, 127.2 (Ar-CH), 117.9 (CH<sub>2</sub>), 93.9 (CCl<sub>3</sub>), 63.8 and 60.9 (CH), 53.1 and 49.5 (CH<sub>2</sub>), 36.1 (CH<sub>2</sub>); IR (NaCl) 1686 cm<sup>-1</sup>; HRMS (ESI-TOF) calcd. for C<sub>19</sub>H<sub>19</sub>Cl<sub>3</sub>NO 382.0527 [M+H]<sup>+</sup>, found 382.0530.

#### **2,2,2-Trichloro-*N*-methyl-*N*-(4-oxocyclohex-2-en-1-yl)acetamide (**1o**)**

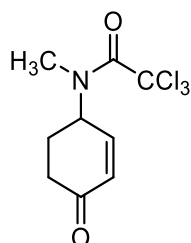

Physical State: white solid, m.p.: 110-113 °C

<sup>7</sup> For **1r** see: J. Quirante, J.; Escolano, C.; Diaba, F.; Bonjoch, J. *Heterocycles*, 1999, **50**, 731-738.

<sup>8</sup> For **1p** see: S. Jansana, F. Diaba, J. Bonjoch, *Org. Lett.*, 2019, **21**, 5757-5761.

$^1\text{H}$  NMR (400 MHz,  $\text{CDCl}_3$ )  $\delta$  6.81 (d,  $J = 10.3$  Hz, 1H), 6.17 (ddd,  $J = 10.3, 2.8, 1.1$  Hz, 1H), 5.45 and 5.35 (2 br s, 1H), 3.23 and 2.91 (2 br s, 3H,  $\text{CH}_3$ ), 2.62-2.40 and 2.35-2.09 (2 m, 4H);  $^{13}\text{C}$  NMR (101 MHz,  $\text{CDCl}_3$ )  $\delta$  197.1 (C=O), 160.7 (C=O), 149.3 (CH), 132.0 (CH), 92.9 ( $\text{CCl}_3$ ), 56.1 and 55.8 (CH), 36.5 ( $\text{CH}_2$ ), 34.2 and 32.5 ( $\text{CH}_3$ ), 27.6 and 26.1 ( $\text{CH}_2$ ); IR (NaCl) 3056, 2986, 1681  $\text{cm}^{-1}$ ; HRMS (ESI-TOF) calcd. for  $\text{C}_9\text{H}_{11}\text{Cl}_3\text{NO}_2$   $[\text{M}+\text{H}]^+$  269.9850, found 269.9851. Calcd for  $\text{C}_9\text{H}_{10}\text{Cl}_3\text{NNaO}_2$   $[\text{M}+\text{Na}]^+$  291.9669, found 291.9670.

### ***N*-Benzyl-2,2,2-trichloro-*N*-((4-oxocyclohex-2-en-1-yl)methyl)acetamide (1q)**

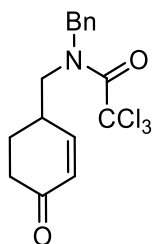

Physical state: amorphous solid

$^1\text{H}$  NMR (400 MHz,  $\text{CDCl}_3$ )  $\delta$  7.43-7.30 (m, 3H, ArH), 7.28-7.22 (m, 2H, ArH), 6.71 (d,  $J = 10.2$  Hz, 1H), 6.03 (dd,  $J = 10.2, 2.5$  Hz, 1H), 5.06 (s, 2H,  $\text{CH}_2\text{Ar}$ ), 3.51 – 3.28 (m, 2H,  $\text{CH}_2$ ), 2.97 (m, 1H), 2.52 (dt,  $J = 16.9, 5.0$  Hz, 1H), 2.36 (ddd,  $J = 16.9, 12.0, 4.9$  Hz, 1H), 2.10 (m, 1H), 1.74 (m, 1H);  $^{13}\text{C}$  NMR (101 MHz,  $\text{CDCl}_3$ )  $\delta$  198.7 (CO), 161.5 (CO), 150.1 (CH), 134.7 (C), 130.3 (CH), 129.1 (CH), 128.2 (CH), 127.0 (CH), 92.9 ( $\text{CCl}_3$ ), 54.3 ( $\text{CH}_2$ ), 51.2 ( $\text{CH}_2$ ), 36.3 ( $\text{CH}_2$ ), 34.0 (CH), 26.5 ( $\text{CH}_2$ ); IR (NaCl) 3060, 3033, 2942, 2871, 1678  $\text{cm}^{-1}$ ; HRMS (ESI-TOF) calcd. for  $\text{C}_{16}\text{H}_{17}\text{Cl}_3\text{NO}_2$   $[\text{M}+\text{H}]^+$  360.0319, found 360.0317.

### **3. Photocatalyzed synthesis of lactams 2 in the presence of ammonia**

A mixture of trichloroacetamide **1** (0.2 mmol) and *fac*-Ir(ppy)<sub>3</sub> (1.3 mg, 0.002 mmol, 1 mol%) in a THF/Acetone solution (4 mL, 1:1) saturated with  $\text{NH}_3$  (4-11 equiv.) was stirred at rt under blue LEDs irradiation for 0.5-24 h. The mixture was then concentrated and purified by chromatography using a mixture of Hexane/EtOAc (1:0 to 1:1) or cyclohexane/AcOEt (1:0 to 1:1) as eluent to provide the corresponding lactams **2**. The results obtained for the different substrates is indicated in the following Table 1.

**Table 1.** Scope of the photocatalyzed synthesis of lactams **2** in the presence of  $\text{Ir}(\text{ppy})_3$  and ammonia<sup>a</sup>

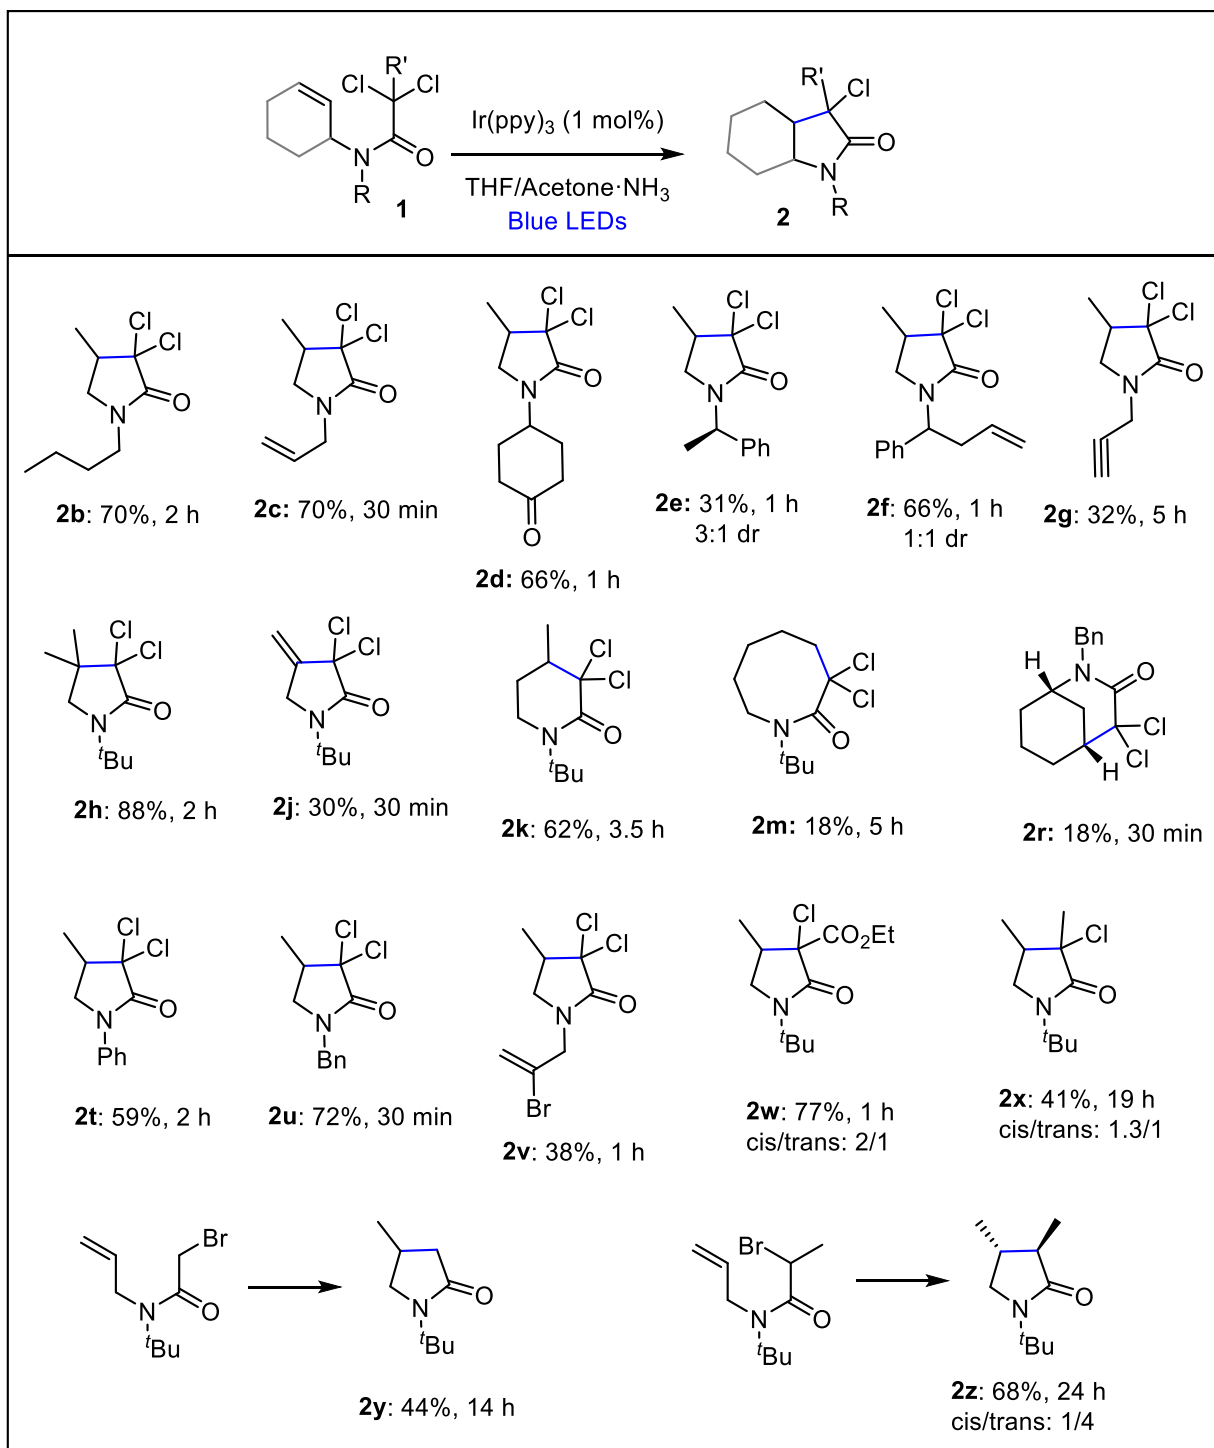

<sup>a</sup> Except for **2i**, **2f** and **2j**, lactams **2** were already characterized in our previous work (see ref. 2).

#### 4. Photocatalyzed synthesis of lactams **2** in THF or 2-MeTHF alone under violet irradiation

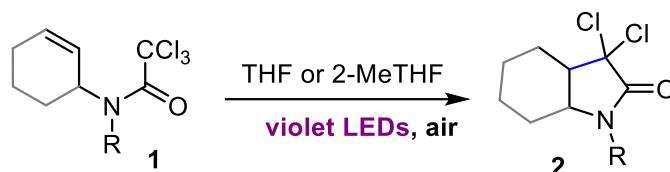

Trichloroacetamide **1** (0.2-2 mmol) in THF or 2-MeTHF (4–40 mL) was stirred at rt under violet LEDs irradiation for the time indicated. The reaction mixture was then concentrated and purified by chromatography using a mixture of Hexane/EtOAc (1:0 to 1:1) or cyclohexane/EtOAc (1:0 to 1:1) as eluent, to provide the corresponding lactams **2** and/or **3**.

#### **(R)**-3,3-Dichloro-4-methyl-1-((*S*)-1-phenylethyl)pyrrolidin-2-one (**2e**, diastereomer less polar)

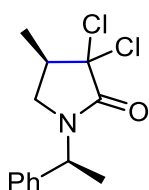

Physical state: colourless oil

$[\alpha]_D^{23} = -102.5$  (*c* 1, MeOH)

$^1\text{H NMR}$  (400, MHz  $\text{CDCl}_3$ )  $\delta$  7.40-7.26 (m, 5H, ArH), 5.47 (q,  $J = 7.1$  Hz, 1H), 2.98 (dd,  $J = 9.8, 7.1$  Hz, 1H, H-5), 2.92 (dd,  $J = 9.8, 8.5$  Hz, 1H, H-5), 2.59 (dq,  $J = 8.4, 6.7$  Hz, 1H, H-4), 1.54 (d,  $J = 7.1$  Hz, 3H,  $\text{CH}_3$ ), 1.27 (d,  $J = 6.6$  Hz, 3H,  $\text{CH}_3$ );  $^{13}\text{C NMR}$  (101 MHz,  $\text{CDCl}_3$ )  $\delta$  166.6 (C-2), 138.7 (*ipso*-C), 128.8, 128.0, 127.1 (Ar-CH), 87.6 (C-3), 50.5 (CH), 45.4 (C-4 and C-5), 15.5 ( $\text{CH}_3$ ), 11.6 ( $\text{CH}_3$ ); IR (NaCl) 3059, 2978, 2937, 1713  $\text{cm}^{-1}$ ; HRMS (ESI-TOF) calcd. for  $\text{C}_{13}\text{H}_{16}\text{Cl}_2\text{NO}$   $[\text{M}+\text{H}]^+$  272.0603, found 272.0604.

#### **(S)**-3,3-Dichloro-4-methyl-1-((*S*)-1-phenylbut-3-en-1-yl)pyrrolidin-2-one (**epi-2e**, diastereomer more polar)

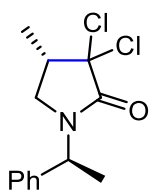

Physical state: white solid, m.p.: 89-91 °C

$[\alpha]_D^{23} = -150.1$  (c 1, MeOH)

$^1\text{H}$  NMR (400 MHz  $\text{CDCl}_3$ )  $\delta$  7.38-7.25 (m, 5H, ArH), 5.49 (q,  $J = 7.1$  Hz, 1H), 3.25 (dd,  $J = 9.9, 6.8$  Hz, 1H, H-5), 2.73 (dq,  $J = 8.4, 6.7$  Hz, H-4), 2.53 (dd,  $J = 9.9, 8.4$  Hz, 1H, H-5), 1.58 (d,  $J = 7.1$  Hz, 3H,  $\text{CH}_3$ ), 1.22 (d,  $J = 6.6$  Hz, 3H,  $\text{CH}_3$ );  $^{13}\text{C}$  NMR (101 MHz,  $\text{CDCl}_3$ )  $\delta$  166.6 (C-2), 138.5 (*ipso*-C), 128.7, 128.0, 127.0 (Ar-CH), 87.5 (C-3), 50.2 (CH), 45.4 (C-5), 45.3 (C-4), 15.8 ( $\text{CH}_3$ ), 11.8 ( $\text{CH}_3$ ); IR (NaCl) 3054, 2981, 2939, 1705  $\text{cm}^{-1}$ ; HRMS (ESI-TOF) calcd.  $\text{C}_{13}\text{H}_{16}\text{Cl}_2\text{NO}$   $[\text{M}+\text{H}]^+$  272.0603, found 272.0602.

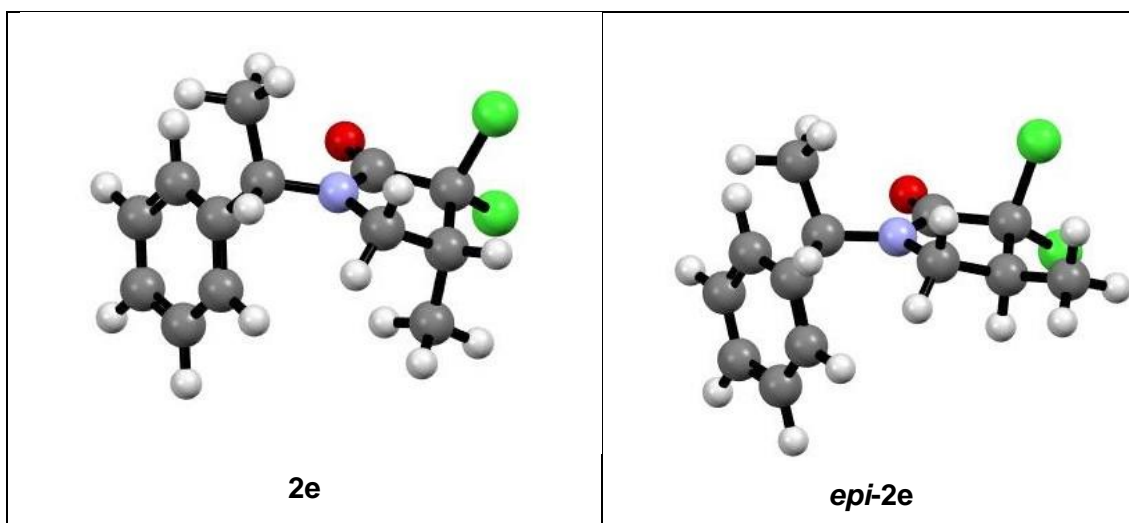

**(*RS*)-3,3-Dichloro-4-methyl-1-((*SR*)-1-phenylbut-3-en-1-yl)pyrrolidin-2-one (2f, diastereomer less polar)**

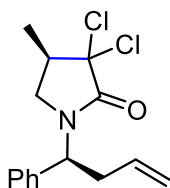

Physical state: colourless oil

$^1\text{H}$  NMR (400 MHz  $\text{CDCl}_3$ )  $\delta$  7.41-7.24 (m, 5H, ArH), 5.79 (dddd,  $J = 17.6, 10.3, 7.7, 5.7$  Hz, 1H, =CH), 5.41 (dd,  $J = 10.2, 5.8$  Hz, 1H), 5.19 (dq,  $J = 17.1, 1.6$  Hz, 1H, = $\text{CH}_2$ ), 5.11 (dq,  $J = 10.2, 1.3$  Hz, 1H, = $\text{CH}_2$ ), 3.03 (dd,  $J = 9.6, 7.0$  Hz, 1H, H-5), 2.94 (dd,  $J = 9.6, 8.5$  Hz, 1H, H-5), 2.85-2.2.64 (m, 2H), 2.56 (m, 1H, H-4), 1.26 (d,  $J = 6.6$  Hz, 3H,  $\text{CH}_3$ );  $^{13}\text{C}$  NMR (101 MHz,  $\text{CDCl}_3$ )  $\delta$  167.1 (CO), 137.6 (*ipso*-C), 133.4 (=CH), 128.9, 128.2, 127.5 (Ar-CH), 118.4 (= $\text{CH}_2$ ), 87.4 (C-3), 54.4 (CH), 45.6 (C-4 and C-5), 34.5 ( $\text{CH}_2$ ), 11.7 ( $\text{CH}_3$ ); IR (NaCl) 3064, 3031, 2978, 2936, 2879, 1719  $\text{cm}^{-1}$ ; HRMS (ESI-TOF) calc. for



C<sub>15</sub>H<sub>18</sub>Cl<sub>2</sub>NO 298.0760 [M+H]<sup>+</sup>, found 298.0755. Calcd. for C<sub>15</sub>H<sub>17</sub>Cl<sub>2</sub>NNaO 320.0579 [M+Na]<sup>+</sup>, found 320.0576.

**(*RS*)-3,3-Dichloro-4-methyl-1-((*RS*)-1-phenylbut-3-en-1-yl)pyrrolidin-2-one (*epi*-2f, diastereomer more polar)**

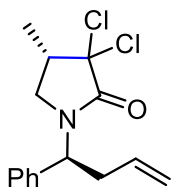

Physical state: amorphous solid

<sup>1</sup>H NMR (400 MHz, CDCl<sub>3</sub>) δ 7.43-7.22 (m, 5H, ArH), 5.80 (dddd, *J* = 17.1, 10.2, 8.0, 5.5 Hz, 1H, =CH), 5.40 (dd, *J* = 10.2, 6.0 Hz, 1H), 5.16 (dq, *J* = 16.9, 1.5 Hz, 1H, =CH<sub>2</sub>), 5.11 (dq, *J* = 10.2, 1.3 Hz, 1H, =CH<sub>2</sub>), 3.24 (dd, *J* = 9.7, 6.7 Hz, 1H, H-5), 2.88- 2.62 (m, 3H), 2.56 (dd, *J* = 9.7, 8.4 Hz, 1H, H-5), 1.21 (d, *J* = 6.6 Hz, 3H, CH<sub>3</sub>); <sup>13</sup>C NMR (101 MHz, CDCl<sub>3</sub>) δ 167.1 (C-2), 137.4 (*ipso*-C), 133.9 (=CH), 128.8, 128.1, 127.4 (Ar-CH), 118.0 (=CH<sub>2</sub>), 87.4 (C-3), 54.3 (CH), 45.7 (C-5), 45.2 (C-4), 34.2 (CH<sub>2</sub>), 11.7 (CH<sub>3</sub>); IR (NaCl) 3062, 3032, 2979, 2937, 2881, 1717 cm<sup>-1</sup>; HRMS (ESI-TOF) calcd. for C<sub>15</sub>H<sub>18</sub>Cl<sub>2</sub>NO 298.0760 [M+H]<sup>+</sup>, found 298.0756. Calcd. for C<sub>15</sub>H<sub>17</sub>Cl<sub>2</sub>NNaO 320.0579 [M+Na]<sup>+</sup>, found 320.0579.

**1-(*tert*-Butyl)-3,3-dichloro-4-methylenepyrrolidin-2-one (2j)**

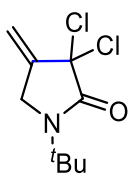

Physical state: White solid, m.p.: 90-95 °C

<sup>1</sup>H NMR (400 MHz, CDCl<sub>3</sub>) δ 5.91 (td, *J* = 2.1, 1.0 Hz, 1H, =CH<sub>2</sub>), 5.45 (td, *J* = 1.8, 1.0 Hz, 1H, =CH<sub>2</sub>), 4.12 (t, *J* = 1.9 Hz, 2H, CH<sub>2</sub>-5), 1.47 (s, 9H, CH<sub>3</sub>); <sup>13</sup>C NMR (101 MHz, CDCl<sub>3</sub>) δ 165.4 (C-2), 141.5 (C-4), 115.1 (=CH<sub>2</sub>), 79.9 (C-3), 55.5 (C), 47.3 (C-5), 27.2 (CH<sub>3</sub>); IR (NaCl) 3104, 2977, 2936, 2872, 1713, 1669 cm<sup>-1</sup>; HRMS (ESI-TOF) calcd. for C<sub>9</sub>H<sub>14</sub>Cl<sub>2</sub>NO 222.0447 [M+H]<sup>+</sup>, found 222.0446. Calcd. for C<sub>9</sub>H<sub>13</sub>Cl<sub>2</sub>NNaO 244.0266 [M+Na]<sup>+</sup>, found 244.0273.

**(4*RS*,6*SR*)-1-Benzyl-3,3-dichloro-4-methyl-6-phenylpiperidin-2-one (2I,  
diastereomer less polar)**

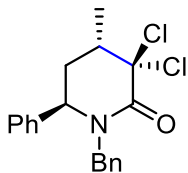

Physical state: amorphous solid

$^1\text{H}$  NMR (400 MHz,  $\text{CDCl}_3$ )  $\delta$  7.46-7.26 (m, 6H, ArH), 7.21-7.10 (m, 4H, ArH), 5.59 (d,  $J$  = 14.8 Hz, 1H,  $\text{CH}_2\text{Ar}$ ), 4.51 (dd,  $J$  = 6.1, 2.2 Hz, 1H, H-6), 3.46 (d,  $J$  = 14.8 Hz, 1H,  $\text{CH}_2\text{Ar}$ ), 2.68 (dq,  $J$  = 12.8, 6.4, 2.8 Hz, 1H, H-4), 2.31 (ddd,  $J$  = 14.2, 12.4, 6.1 Hz, 1H, H-5), 1.77 (dt,  $J$  = 14.3, 2.5 Hz, 1H, H-5), 1.22 (d,  $J$  = 6.4 Hz, 3H,  $\text{CH}_3$ );  $^{13}\text{C}$  NMR (101 MHz,  $\text{CDCl}_3$ )  $\delta$  165.1 (C-2), 139.7 (*ipso*-C), 136.1 (*ipso*-C), 129.2, 128.8, 128.1, 128.0, 127.8, 126.3 (Ar-CH), 89.2 (C-3), 58.3 (C-6), 49.4 ( $\text{CH}_2\text{Ar}$ ), 39.2 (C-4), 35.1 (C-5), 16.5 ( $\text{CH}_3$ ); IR (NaCl) 3155, 3022, 2928, 2899, 1669  $\text{cm}^{-1}$ ; HRMS (ESI-TOF) calc. for  $\text{C}_{19}\text{H}_{20}\text{Cl}_2\text{NO}$   $[\text{M}+\text{H}]^+$  348.0916, found 349.0918.

**(4*RS*,6*RS*)-1-Benzyl-3,3-dichloro-4-methyl-6-phenylpiperidin-2-one (*epi*-2I,  
diastereomer more polar)**

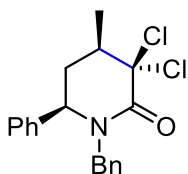

$^1\text{H}$  NMR (400 MHz,  $\text{CDCl}_3$ )  $\delta$  7.46-7.08 (m, 8H, ArH), 7.05-6.98 (m, 2H, ArH), 5.35 (d,  $J$  = 14.6 Hz, 1H,  $\text{CH}_2\text{Ar}$ ), 4.30 (dd,  $J$  = 11.2, 6.4 Hz, 1H, H-6), 3.54 (d,  $J$  = 14.6 Hz, 1H,  $\text{CH}_2\text{Ar}$ ), 2.59 (dq,  $J$  = 12.7, 6.4, 3.6 Hz, 1H, H-4), 2.10 (ddd,  $J$  = 14.7, 12.4, 11.2 Hz, 1H, H-5), 2.02 (ddd,  $J$  = 14.7, 6.4, 3.6 Hz, 1H, H-5), 1.33 (d,  $J$  = 6.4 Hz, 3H,  $\text{CH}_3$ );  $^{13}\text{C}$  NMR (101 MHz,  $\text{CDCl}_3$ )  $\delta$  165.1 (C-2), 140.4 (*ipso*-C), 136.2 (*ipso*-C), 129.1, 128.6, 128.4, 127.6, 127.0 (Ar-CH), 89.4 (C-3), 60.2 (C-6), 48.2 ( $\text{CH}_2\text{Ar}$ ), 42.8 (C-4), 37.1 (C-5), 16.2 ( $\text{CH}_3$ ).

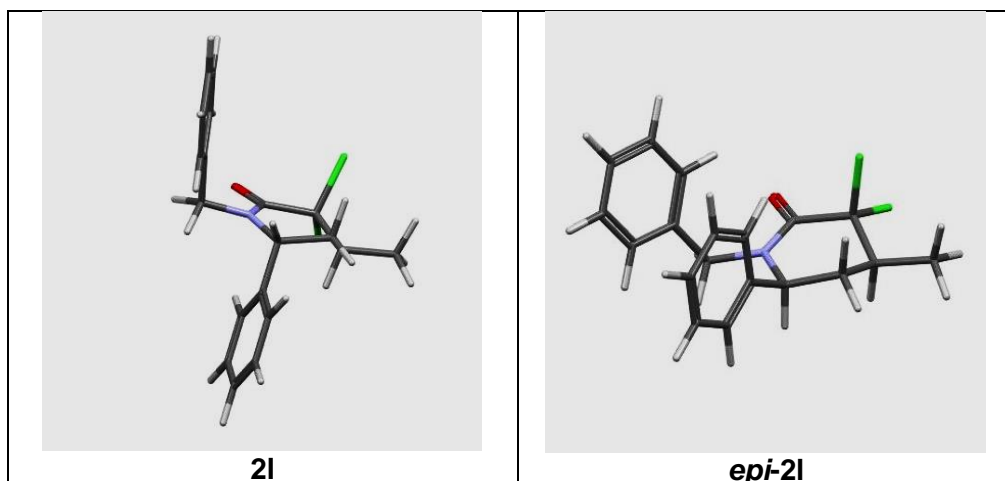

**(3*aRS*,7*aSR*)-3,3-Dichloro-1-methylhexahydro-2*H*-indole-2,5(3*H*)-dione (2o)**

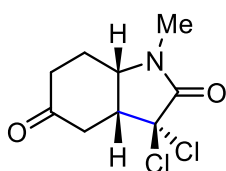

Physical state: amorphous solid

$^1\text{H}$  NMR (400 MHz  $\text{CDCl}_3$ )  $\delta$  3.91 (ddd,  $J = 8.8, 7.1, 5.0$  Hz, 1H, H-7a), 3.36 (q, 1H,  $J = 7.2$  Hz, H-3a), 3.01 (s, 3H,  $\text{CH}_3$ ), 2.83 (dd,  $J = 16.5, 6.8$  Hz, 1H, H-4), 2.72 (ddd,  $J = 16.5, 7.8, 0.9$  Hz, 1H, H-4), 2.49-2.42 (m, 1H), 2.36-2.24 (m, 2H), 2.19-2.08 (m, 1H);  $^{13}\text{C}$  NMR (101 MHz,  $\text{CDCl}_3$ )  $\delta$  206.5 (C-5), 166.2 (C-2), 85.2 (C-3), 55.0 (C-7a), 48.7 (C-3a), 38.4 (C-4), 35.6 (C-6), 29.0 ( $\text{CH}_3$ ), 24.3 (C-7); IR (NaCl) 2950, 2919, 2851, 1716, 1674  $\text{cm}^{-1}$ ; HRMS (ESI-TOF) calcd. for  $\text{C}_9\text{H}_{12}\text{Cl}_2\text{NO}_2$   $[\text{M}+\text{H}]^+$  236.0240, found 236.0238.

**(3*aRS*,4*RS*,7*aRS*)-3,3,4-Trichloro-1-methylhexahydro-2*H*-indole-2,5(3*H*)-dione (3o)**

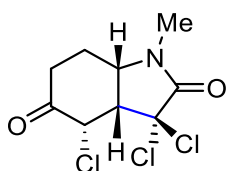

Physical state: amorphous solid

$^1\text{H}$  NMR (400 MHz,  $\text{CDCl}_3$ )  $\delta$  4.85 (d,  $J = 4.9$  Hz, 1H, H-4), 3.86 (ddd,  $J = 11.3, 8.2, 5.0$  Hz, 1H, H-7a), 3.49 (ddd,  $J = 8.3, 5.0, 0.6$  Hz, 1H, H-3a), 2.94 (s, 3H,  $\text{CH}_3$ ), 2.76 (ddd,  $J = 16.9, 13.0, 5.9$  Hz, 1H, H-6), 2.48 (dddd,  $J = 16.9, 4.8, 3.5, 0.9$  Hz, 1H, H-6), 2.36 (dddd,  $J = 13.8, 5.9, 4.5, 3.6, 0.9$  Hz, 1H, H-7), 2.06 (tdd,  $J = 13.8, 11.3, 5.1$  Hz, 1H, H-

7);  $^{13}\text{C}$  NMR (101 MHz,  $\text{CDCl}_3$ )  $\delta$  199.2 (C-5), 165.2 (C-2), 82.2 (C-3), 57.2 (C-3a and C-4), 54.6 (C-7a), 32.7 (C-6), 29.3 ( $\text{CH}_3$ ), 24.4 (C-7); IR (NaCl)  $1717\text{ cm}^{-1}$ ; HRMS (ESI-TOF) calcd. for  $\text{C}_9\text{H}_{11}\text{Cl}_3\text{NO}_2$   $[\text{M}+\text{H}]^+$  269.9850, found 269.9853.

### $\beta$ -Lactam 4p

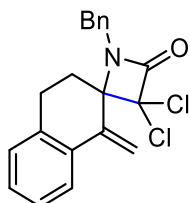

Physical state: colourless oil

$^1\text{H}$  NMR (400 MHz,  $\text{CDCl}_3$ )  $\delta$  7.73-7.66 (m, 1H, ArH), 7.39-7.28 (m, 5H, ArH), 7.27-7.20 (m, 2H, ArH), 7.12-7.07 (m, 1H, ArH), 6.02 (s, 1H,  $=\text{CH}_2$ ), 5.22 (s, 1H,  $=\text{CH}_2$ ), 4.94 (d,  $J = 15.4$  Hz, 1H,  $\text{CH}_2\text{Ar}$ ), 4.04 (d,  $J = 15.4$  Hz, 1H,  $\text{CH}_2\text{Ar}$ ), 3.28 (ddd,  $J = 17.6, 12.6, 5.7$  Hz, 1H), 2.84 (ddd,  $J = 17.6, 5.9, 2.6$  Hz, 1H), 2.11 (ddd,  $J = 13.6, 5.5, 2.5$  Hz, 1H), 1.99 (ddd,  $J = 13.6, 12.6, 5.9$  Hz, 1H);  $^{13}\text{C}$  NMR (101 MHz,  $\text{CDCl}_3$ )  $\delta$  161.9 (CO), 139.6, 135.9, 134.8, 132.0 (C), 129.0, 128.8, 128.6, 128.3, 128.2, 126.6, 125.0 (Ar-CH), 112.4 ( $=\text{CH}_2$ ), 88.4 ( $\text{CCl}_2$ ), 75.4 (C), 44.6 ( $\text{CH}_2\text{Ar}$ ), 30.0 ( $\text{CH}_2$ ), 26.4 ( $\text{CH}_2$ ); IR (NaCl) 3068, 3032, 2926, 2854,  $1781\text{ cm}^{-1}$ ; HRMS (ESI-TOF) calcd. for  $\text{C}_{20}\text{H}_{18}\text{Cl}_2\text{NO}$   $[\text{M}+\text{H}]^+$  358.0760, found 358.0758.

### $\gamma$ -Lactam 2p'

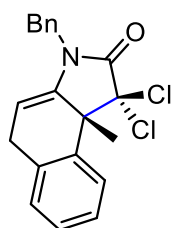

$^1\text{H}$  NMR (400 MHz,  $\text{CDCl}_3$ )  $\delta$  7.75 (dd,  $J = 7.6, 1.5$  Hz, 1H, ArH), 7.60-7.02 (m, 8H, ArH), 5.33 (dd,  $J = 4.5, 3.7$  Hz, 1H,  $=\text{CH}$ ), 4.85 (d,  $J = 4.8$  Hz, 1H,  $\text{CH}_2\text{Ar}$ ), 4.79 (d,  $J = 4.8$  Hz, 1H,  $\text{CH}_2\text{Ar}$ ), 3.41 (d,  $J = 4.1$  Hz, 2H,  $\text{CH}_2$ ), 1.47 (s, 3H,  $\text{CH}_3$ );  $^{13}\text{C}$  NMR (101 MHz,  $\text{CDCl}_3$ )  $\delta$  166.4 (CO), 139.6, 136.3, 135.0, 134.3 (C), 128.8, 128.2, 127.9, 127.2, 126.6, 125.8 (ArCH), 100.7 ( $=\text{CH}$ ), 88.3 ( $\text{CCl}_2$ ), 51.9 (C), 45.0 ( $\text{CH}_2\text{Ar}$ ), 28.7 ( $\text{CH}_2$ ), 28.1 ( $\text{CH}_3$ ).

### $\gamma$ -Lactam 5p

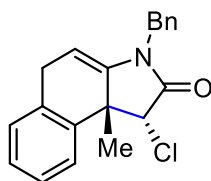

Physical state: colourless viscous oil

$^1\text{H}$  NMR (400 MHz,  $\text{CDCl}_3$ )  $\delta$  7.64 (dd,  $J = 7.6, 1.5$  Hz, 1H, ArH), 7.36-7.14 (m, 8H, ArH), 5.24 (dd,  $J = 6.2, 2.3$  Hz, 1H, =CH), 4.98 (s, 1H), 4.90 (d,  $J = 15.3$  Hz, 1H,  $\text{CH}_2\text{Ar}$ ), 4.63 (d,  $J = 15.3$  Hz, 1H,  $\text{CH}_2\text{Ar}$ ), 3.41 (br d,  $J = 20.1$  Hz, 1H), 3.32 (dd,  $J = 20.1$  Hz, 1H), 1.35 (s, 3H,  $\text{CH}_3$ );  $^{13}\text{C}$  NMR (101 MHz,  $\text{CDCl}_3$ )  $\delta$  169.0 (CO), 142.5, 140.6, 135.4 (C), 128.7, 128.0, 127.7, 127.4, 127.0, 126.9, 124.3 (ArCH), 98.5 (=CH), 64.6 (CHCl), 45.5 (C), 44.5 ( $\text{CH}_2\text{Ar}$ ), 29.0 ( $\text{CH}_2$ ), 24.1 ( $\text{CH}_3$ ); HRMS (ESI-TOF) calcd. for  $\text{C}_{20}\text{H}_{19}\text{ClNO}$   $[\text{M}+\text{H}]^+$  324.1150, found 324.1153.

### (4a*RS*,8a*SR*)-2-Benzyl-4,4-dichlorohexahydroisoquinoline-3,6(2*H*,4*H*)-dione (2q)

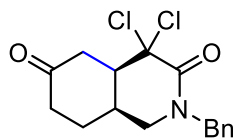

Physical state: amorphous solid

$^1\text{H}$  NMR (400 MHz  $\text{CDCl}_3$ )  $\delta$  7.39-7.25 (m, 5H, ArH), 4.77 (d,  $J = 14.5$  Hz, 1H,  $\text{CH}_2\text{Ar}$ ), 4.57 (d,  $J = 14.5$  Hz, 1H,  $\text{CH}_2\text{Ar}$ ), 3.48 (dd,  $J = 13.1, 10.6$  Hz, 1H), 3.36 (dd,  $J = 13.1, 7.0$  Hz, 1H), 3.04-2.90 (m, 3H), 2.43-2.27 (m, 3H), 2.01-1.83 (m, 2H);  $^{13}\text{C}$  NMR (101 MHz,  $\text{CDCl}_3$ )  $\delta$  207.1 (CO), 162.5 (CO), 135.6 (*ipso*-C), 129.0, 128.2, 128.1, 85.6 (C), 51.7 ( $\text{CH}_2\text{Ar}$ ), 50.0 (CH), 46.8 ( $\text{CH}_2$ ), 40.0 ( $\text{CH}_2$ ), 35.9 ( $\text{CH}_2$ ), 28.8 (CH), 25.5 ( $\text{CH}_2$ ); IR (NaCl) 3061, 3029, 2929, 1714, 1673  $\text{cm}^{-1}$ ; HRMS (ESI-TOF) calc. for  $\text{C}_{16}\text{H}_{18}\text{Cl}_2\text{NO}_2$   $[\text{M}+\text{H}]^+$  326.0709, found 326.0713.

### (1*RS*,5*SR*)-2-Benzyl-4,4-dichloro-2-azabicyclo[3.3.1]nonan-3-one (2r)

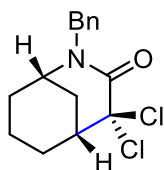

Physical state: White solid, m.p.: 116-120  $^{\circ}\text{C}$

$^1\text{H}$  NMR (400 MHz  $\text{CDCl}_3$ )  $\delta$  7.36-7.24 (m, 5H, ArH), 5.36 (d,  $J = 14.9$  Hz, 1H,  $\text{CH}_2\text{Ar}$ ), 3.86 (d,  $J = 14.9$  Hz, 1H,  $\text{CH}_2\text{Ar}$ ), 3.53 (br s, 1H, H-1), 2.84 (m, 1H, H-5), 2.57 (dm,  $J = 13.7$ , 1H), 2.43 (dm,  $J = 13.6$ , 1H), 1.85 (m, 1H), 1.80 (ddd,  $J = 13.7, 3.5, 2.4$  Hz, 1H), 1.70-1.53 (m, 2H), 1.50-1.37 (m, 2H);  $^{13}\text{C}$  NMR (101 MHz,  $\text{CDCl}_3$ )  $\delta$  165.6 (CO), 136.6 (*ipso*-C), 128.8, 127.8, 127.7 (ArCH), 87.9 (C-4), 52.1 (C-1), 49.1 ( $\text{CH}_2\text{Ar}$ ), 45.8 (C-5), 29.8 ( $\text{CH}_2$ ), 28.9 ( $\text{CH}_2$ ), 27.9 ( $\text{CH}_2$ ), 16.1 ( $\text{CH}_2$ ); IR (NaCl) 3060, 3031, 2958, 2929, 2870, 1662, 1601  $\text{cm}^{-1}$ ; HRMS (ESI-TOF) calcd. for  $\text{C}_{15}\text{H}_{18}\text{Cl}_2\text{NO}$   $[\text{M}+\text{H}]^+$  298.0760, found 298.07061.<sup>9</sup>

**(1*RS*,5*RS*,6*RS*)-2-Benzyl-4,4,6-trichloro-6-methyl-2-azabicyclo[3.3.1]nonan-3-one (3s)**

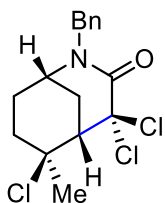

Physical state: white solid, m.p.: 72-74 °C

$^1\text{H}$  NMR (400 MHz,  $\text{CDCl}_3$ )  $\delta$  7.39-7.21 (m, 5H, ArH), 5.34 (d,  $J = 14.9$  Hz, 1H,  $\text{CH}_2\text{Ar}$ ), 3.90 (d,  $J = 14.9$  Hz, 1H,  $\text{CH}_2\text{Ar}$ ), 3.52 (br s, 1H, H-1), 3.07 (br s, 1H, H-5), 2.80-2.67 (m, 2H,  $\text{CH}_2$ -9), 2.12 (s, 3H,  $\text{CH}_3$ ), 2.05-1.94 (m, 2H, H-7 and H-8), 1.88-1.71 (m, 2H, H-7 and H-8);  $^{13}\text{C}$  NMR (101 MHz,  $\text{CDCl}_3$ )  $\delta$  164.1 (CO), 136.2 (*ipso*-C), 128.9, 127.9, 127.8 (ArCH), 85.7 (C-4), 75.6 (C-6), 56.5 (C-5), 50.7 (C-1), 49.2 ( $\text{CH}_2\text{Ar}$ ), 35.4 ( $\text{CH}_3$ ), 33.1 (C-7), 29.4 (C-9), 25.3 (C-8); IR (NaCl) 3054, 3030, 2982, 2941, 1673  $\text{cm}^{-1}$ ; HRMS (ESI-TOF) calcd. for  $\text{C}_{16}\text{H}_{19}\text{Cl}_3\text{NO}$   $[\text{M}+\text{H}]^+$  346.0527, found 346.0526. Calcd. for  $\text{C}_{16}\text{H}_{18}\text{Cl}_3\text{NNaO}$   $[\text{M}+\text{Na}]^+$  368.0346, found 368.0350.

**(1*RS*,5*RS*)-2-Benzyl-4,4-dichloro-6-methylene-2-azabicyclo[3.3.1]nonan-3-one (4s)**

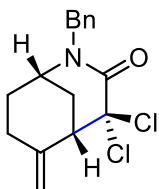

<sup>9</sup> For the characterization of **3r** see: F. Diaba, A. Martínez-Laporta, J. Bonjoch, A. Pereira, J. M. Muñoz-Molina, P. J. Pérez and T. R. Belderrain, *Chem. Commun.*, 2012, **48**, 8799-8801.

Physical state: amorphous solid

$^1\text{H}$  NMR (400 MHz,  $\text{CDCl}_3$ )  $\delta$  7.37-7.24 (m, 5H, ArH), 5.38 (d,  $J = 14.9$  Hz, 1H,  $\text{CH}_2\text{Ar}$ ), 4.96 (dm,  $J = 6.3$  Hz, 2H,  $=\text{CH}_2$ ), 3.93 (d,  $J = 14.9$  Hz, 1H,  $\text{CH}_2\text{Ar}$ ), 3.59 (br s, 1H, H-1), 3.40 (br s, 1H, H-5), 2.66 (ddt,  $J = 13.7, 4.0, 2.7$  Hz, 1H, H-9), 2.33-2.25 (m, 1H, H-7), 2.23-2.10 (m, 1H, H-7), 1.95 (dm, 1H,  $J = 13.4$ , 1H, H-8), 1.86 (ddd,  $J = 13.7, 3.7, 2.4$  Hz, 1H, H-9), 1.51 (tdd,  $J = 13.4, 5.2, 2.4$  Hz, 1H, H-8);  $^{13}\text{C}$  NMR (101 MHz,  $\text{CDCl}_3$ )  $\delta$  165.1 (CO), 144.2 (C-6), 136.4 (*ipso*-C), 128.9, 127.8 (ArCH), 114.4 ( $=\text{CH}_2$ ), 85.3 (C-4), 55.9 (C-5), 51.9 (C-1), 49.3 ( $\text{CH}_2\text{Ar}$ ), 31.2 (C-9), 29.4 (C-7), 25.4 (C-8); IR (NaCl) 3061, 3031, 2938, 2857, 1667, 1604, 1584  $\text{cm}^{-1}$ ; HRMS (ESI-TOF) calcd. for  $\text{C}_{16}\text{H}_{17}\text{Cl}_2\text{NO}$   $[\text{M}+\text{H}]^+$  309.0682, found 309.0685.

## 5. Reactions achieved from 2e and *epi*-2e

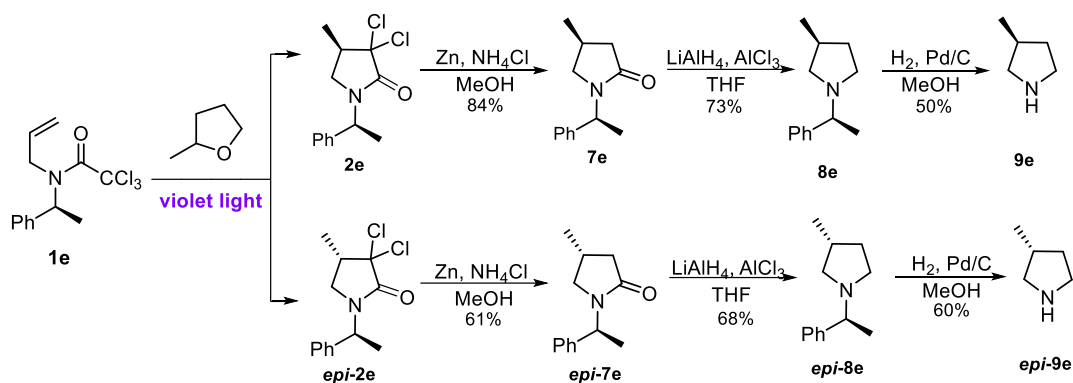

### 5.1. Reductive dechlorination of 2e and *epi*-2e

To a solution 2e (465.4 mg, 1.7 mmol) in MeOH (18 mL) was added  $\text{NH}_4\text{Cl}$  (540 mg, 10.1 mmol) and Zn (1.12 g, 17.1 mmol) and the mixture was stirred at 0 °C for 1 h and then at rt overnight. The reaction mixture was filtered through a short celite pad and the filter cake was washed with MeOH. The solution was then concentrated and purified by chromatography using a mixture of Hexane/EtOAc (1:0 to 1:1) to yield 7e (291.8 mg, 84%). Operating from *epi*-2e and following the same procedure *epi*-7e was isolated (70%).

#### (S)-4-Methyl-1-((S)-1-phenylethyl)pyrrolidin-2-one (7e)

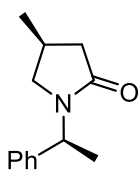

Physical state: colourless viscous oil

$[\alpha]_D^{23} = -134.6$  (*c* 1, MeOH)

$^1\text{H NMR}$  (400 MHz,  $\text{CDCl}_3$ )  $\delta$  7.38-7.22 (m, 5H, ArH), 5.49 (q,  $J = 7.1$  Hz, 1H), 3.09 (dd,  $J = 9.6, 7.6$  Hz, 1H, H-5), 2.87 (dd,  $J = 9.6, 6.3$  Hz, 1H, H-5), 2.56 (dd,  $J = 16.5, 8.4$  Hz, 1H, H-3), 2.30 (octet,  $J = 7.1$  Hz, 1H, H-4), 2.07 (dd,  $J = 16.5, 7.4$  Hz, 1H, H-3), 1.51 (d,  $J = 7.1$  Hz, 3H,  $\text{CH}_3$ ), 1.09 (d,  $J = 6.8$  Hz, 3H,  $\text{CH}_3$ );  $^{13}\text{C NMR}$  (101 MHz,  $\text{CDCl}_3$ )  $\delta$  174.0 (CO), 140.3 (*ipso*-C), 128.4, 127.3, 127.0 (ArCH), 49.6 (C-5), 48.7 (CH), 39.8 (C-3), 26.5 (C-4), 19.5 ( $\text{CH}_3$ ), 16.1 ( $\text{CH}_3$ ). IR (NaCl) 3030, 2961, 2932, 2873, 1667  $\text{cm}^{-1}$ ; HRMS (ESI-TOF) calcd. for  $\text{C}_{13}\text{H}_{18}\text{NO}$   $[\text{M}+\text{H}]^+$  204.1383, found 204.1385.

**(*R*)-4-Methyl-1-((*S*)-1-phenylethyl)pyrrolidin-2-one (*epi*-7e)**

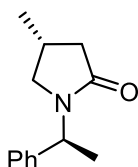

Physical state: colourless viscous oil

$[\alpha]_D^{23} = -141.3$  (*c* 1, MeOH)

$^1\text{H NMR}$  (400 MHz,  $\text{CDCl}_3$ )  $\delta$  7.39-7.22 (m, 5H, ArH), 5.50 (q,  $J = 7.1$  Hz, 1H), 3.42 (dd,  $J = 9.5, 7.5$  Hz, 1H, H-5), 2.59 (dd,  $J = 16.5, 8.4$  Hz, 1H, H-3), 2.51 (dd,  $J = 9.5, 5.6$  Hz, 1H, H-5), 2.37 (m, 1H, H-4), 2.03 (dd,  $J = 16.5, 6.4$  Hz, 1H, H-3), 1.51 (d,  $J = 7.2$  Hz, 3H,  $\text{CH}_3$ ), 0.97 (d,  $J = 6.8$  Hz, 3H,  $\text{CH}_3$ );  $^{13}\text{C NMR}$  (101 MHz,  $\text{CDCl}_3$ )  $\delta$  174.0 (CO), 140.1 (*ipso*-C), 128.5, 127.4, 127.1 (ArCH), 49.4 (C-5), 48.7 (CH), 39.8 (C-3), 26.4 (C-4), 19.6 ( $\text{CH}_3$ ), 16.1 ( $\text{CH}_3$ ); IR (NaCl) 3030, 2961, 2932, 2872, 1667  $\text{cm}^{-1}$ ; HRMS (ESI-TOF) calcd. for  $\text{C}_{13}\text{H}_{18}\text{NO}$   $[\text{M}+\text{H}]^+$  204.1383, found 204.1379.

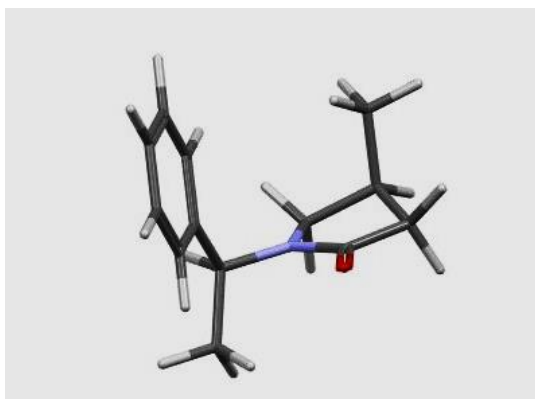

**7e**

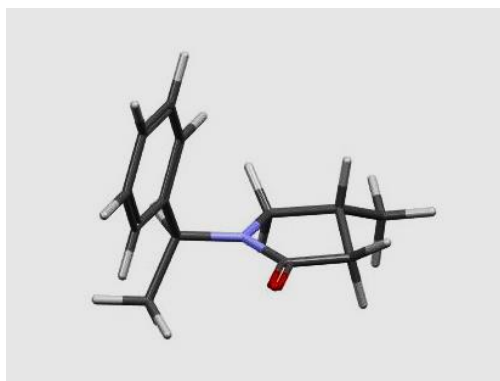

***Epi*-7e**



## 5.2. Reduction of amides **7e** and *epi-7e*

To a solution of AlCl<sub>3</sub> (39 mg, 0.29 mmol) in THF (0.86 mL) was added a 1 M solution of LiAlH<sub>4</sub> in THF (0.46 mL, 0.46 mmol) and the mixture was stirred at rt for 15 min. A solution of **6e** (39 mg, 0.19 mmol) in THF (0.75 mL) was then added dropwise and the mixture was stirred at rt for 4 h under argon atmosphere. The mixture was cooled to 0 °C and quenched with a NaOH aqueous solution until basic pH, extracted with CHCl<sub>3</sub> and the organics were dried and concentrated to yield **8e** (26.6 mg, 73%). Operating from *epi-7e* and following the same procedure *epi-8e* was isolated (68%).

### (*S*)-3-Methyl-1-((*S*)-1-phenylethyl)pyrrolidine (**8e**)

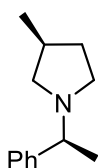

Physical state: colourless viscous oil

$$[\alpha]_D^{23} = -47.2 \text{ (c 1, MeOH)}$$

<sup>1</sup>H NMR (400 MHz, CDCl<sub>3</sub>) δ 7.37-7.17 (m, 5H, ArH), 3.18 (q, *J* = 6.6 Hz, 1H), 2.93 (dd, *J* = 9.1, 7.6 Hz, 1H, H-2), 2.51-2.40 (m, 2H, CH<sub>2</sub>-5), 2.31-2.18 (m, 1H, H-3), 2.97 (m, 1H, H-4), 1.94 (dd, *J* = 9.0, 7.3 Hz, 1H, H-2), 1.37 (d, *J* = 6.6 Hz, 3H, CH<sub>3</sub>), 1.30 (ddt, *J* = 12.5, 8.2, 6.2 Hz, 1H, H-4), 1.00 (d, *J* = 6.8 Hz, 3H, CH<sub>3</sub>); <sup>13</sup>C NMR (101 MHz, CDCl<sub>3</sub>) δ 145.8 (*ipso*-C), 128.2, 127.2, 126.7 (ArCH), 66.0 (CH), 61.0 (C-2), 53.0 (C-5), 32.6 (C-4), 31.7 (C-3), 23.2 (CH<sub>3</sub>), 20.5 (CH<sub>3</sub>); IR (NaCl) 3025, 2954, 2926, 2870, 2774 cm<sup>-1</sup>; HRMS (ESI-TOF) calcd. for C<sub>13</sub>H<sub>20</sub>N [M+H]<sup>+</sup> 190.1590, found 190.1592.

### (*R*)-3-Methyl-1-((*S*)-1-phenylethyl)pyrrolidine (*epi-8e*)

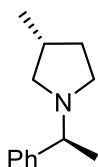

Physical state: colourless viscous oil

$$[\alpha]_D^{23} = -63.0 \text{ (c 1, CHCl}_3\text{)}$$

<sup>1</sup>H NMR (400 MHz, CDCl<sub>3</sub>) δ 7.35-7.19 (m, 5H, ArH), 3.16 (q, *J* = 6.6 Hz, 1H), 2.87 (m, 1H, H-5), 2.65 (dd, *J* = 9.1, 7.3 Hz, 1H, H-2), 2.33 (td, *J* = 9.0, 6.5 Hz, 1H, H-5), 2.26-2.09 (m, 1H, H-4), 2.03 (dddd, *J* = 12.5, 9.4, 8.0, 6.5, H-4), 1.87 (dd, *J* = 9.1, 7.9 Hz, 1H,

H-2), 1.37 (d,  $J = 6.6$  Hz, 3H, CH<sub>3</sub>), 1.36-1.27 (m, 1H, H-3), 0.96 (d,  $J = 6.7$  Hz, 3H, CH<sub>3</sub>); <sup>13</sup>C NMR (101 MHz, CDCl<sub>3</sub>)  $\delta$  145.8 (*ipso*-C), 128.2, 127.2, 126.8 (ArCH), 66.1 (CH), 61.3 (C-2), 52.7 (C-5), 32.5 (C-4), 31.8 (C-3), 23.0 (CH<sub>3</sub>), 20.1 (CH<sub>3</sub>); IR (NaCl) 3026, 2956, 2927, 2870, 2777 cm<sup>-1</sup>; HRMS (ESI-TOF) calcd. for C<sub>13</sub>H<sub>20</sub>N [M+H]<sup>+</sup> 190.1590, found 190.1592.

### 5.3. Debenzylation of amines **8e** and *epi*-**8e**

To a solution **8e** (465.4 mg, 1.7 mmol) in MeOH (18 mL) was added NH<sub>4</sub>Cl (540 mg, 10.1 mmol) and Zn (1.12 g, 17.1 mmol) and the mixture was stirred at 0 °C for 1 h and then at rt overnight. The reaction mixture was filtered through a short celite pad and the filter cake was washed with MeOH. The solution was then carefully concentrated to yield **9e** (208 mg, 60%). Operating from *epi*-**8e** and following the same procedure *epi*-**9e** was isolated (59%).<sup>10</sup>

---

<sup>10</sup> The <sup>1</sup>H and <sup>13</sup>C NMR as well as the specific rotation data of **9** and *epi*-**9** are in accordance with the literature see: (a) K. Kondo; H. Ogawa, T. Shinohara, M. Kurimura, Y. Tanada, K. Kan, H. Yamashita, S. Nakamura, T. Hirano, Y. Yamamura, T. Mori, M. Tominaga, A. Itai, *J. Med. Chem.*, 2000, **43**, 4388–4397; (b) B. Ringdahl, R. Dahlbom, *Acta Pharm. Suec.*, 1978, **15**, 255-263.

## 6. <sup>1</sup>H and <sup>13</sup>C NMR spectra of new compounds

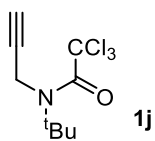

M400AFF\_08122020\_TAN718-5-H1  
M400F / Num.Inv. 1009191  
cdcl3 / Temp: 25C / N.Reg: XXXXXXXXXXXX  
Usuari: san / Mostra: TAN718-5  
Nom: FAIZA DIABA  
Data: 08/12/20 / Ope.: F.DIABA

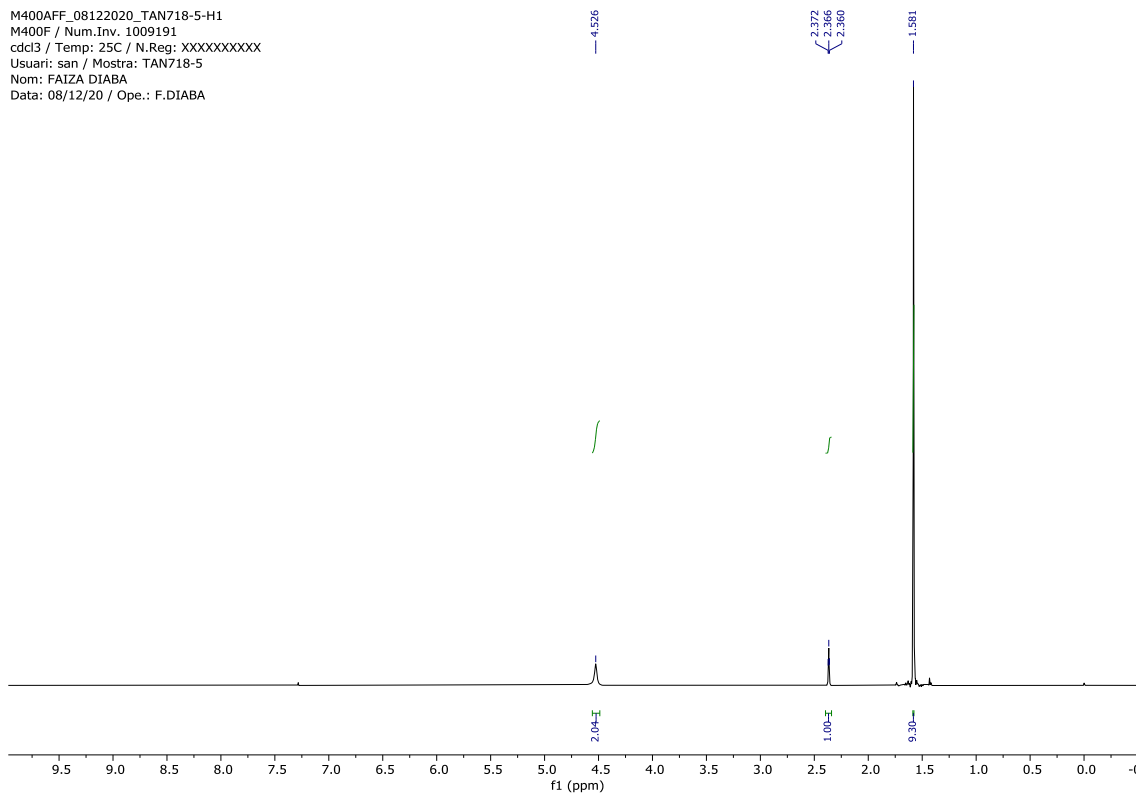

VNMRS400A\_08122020\_TAN718-5-C13  
VNMRS400F / Num.Inv. 205984  
cdcl3 / Temp: 25C / N.Reg: XXXXXXXXXXXX  
Usuari: san / Mostra: TAN718-5  
Nom: FAIZA DIABA  
Data: 08/12/20 / Ope.: F.DIABA

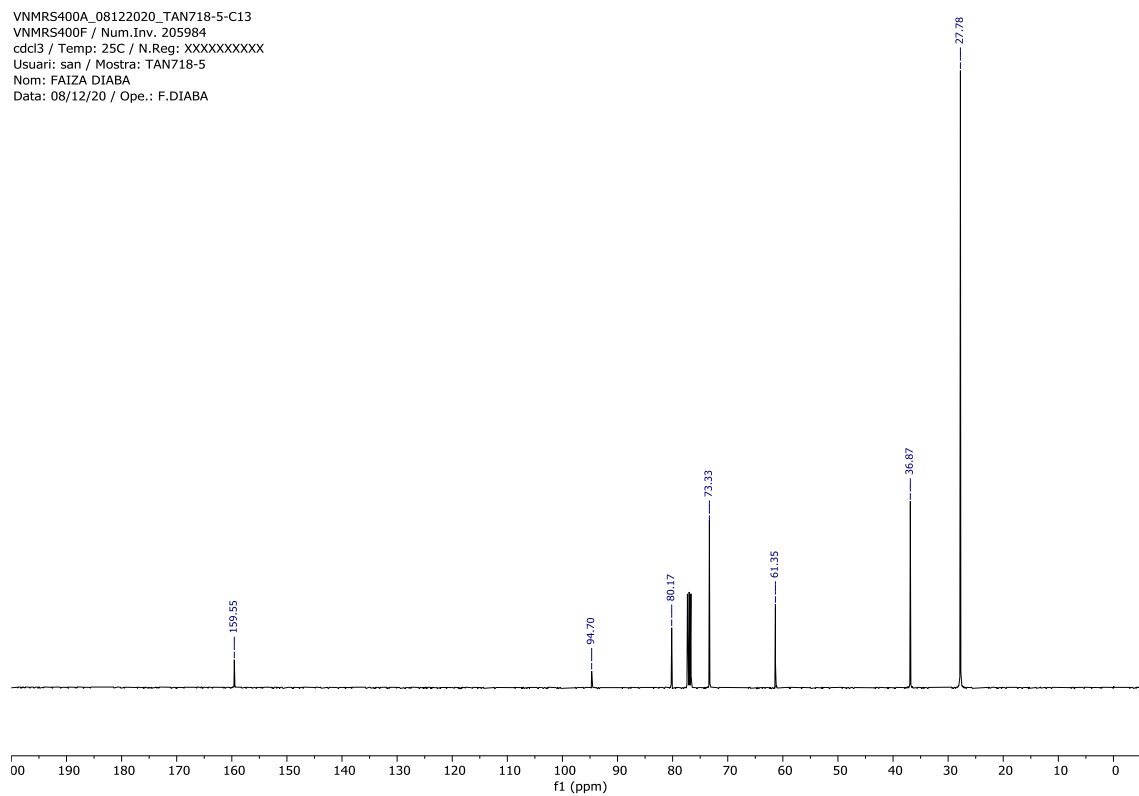

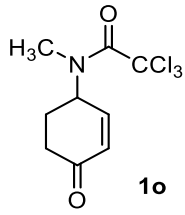

23020288\_B400FA\_07022023\_XGT820-9.1.fid  
 Equip: B400F / N.Inv: 1037597  
 N.Reg: 23020288  
 Usuari: san / Mostra: XGT820-9  
 Nom: GISELA TRENCHS MIR  
 Data: 07/02/2023 17:04:07 h./ Ope.: AUTOSERVEI  
 Experiment: A-H1-zg30 Solvent: CDCl3

6.749  
6.723  
6.122  
6.119  
6.115  
6.112  
6.093  
6.089  
6.086

3.234  
2.920  
2.919  
2.599  
2.586  
2.569  
2.566  
2.558  
2.555  
2.446  
2.514  
2.500  
2.479  
2.466  
2.191

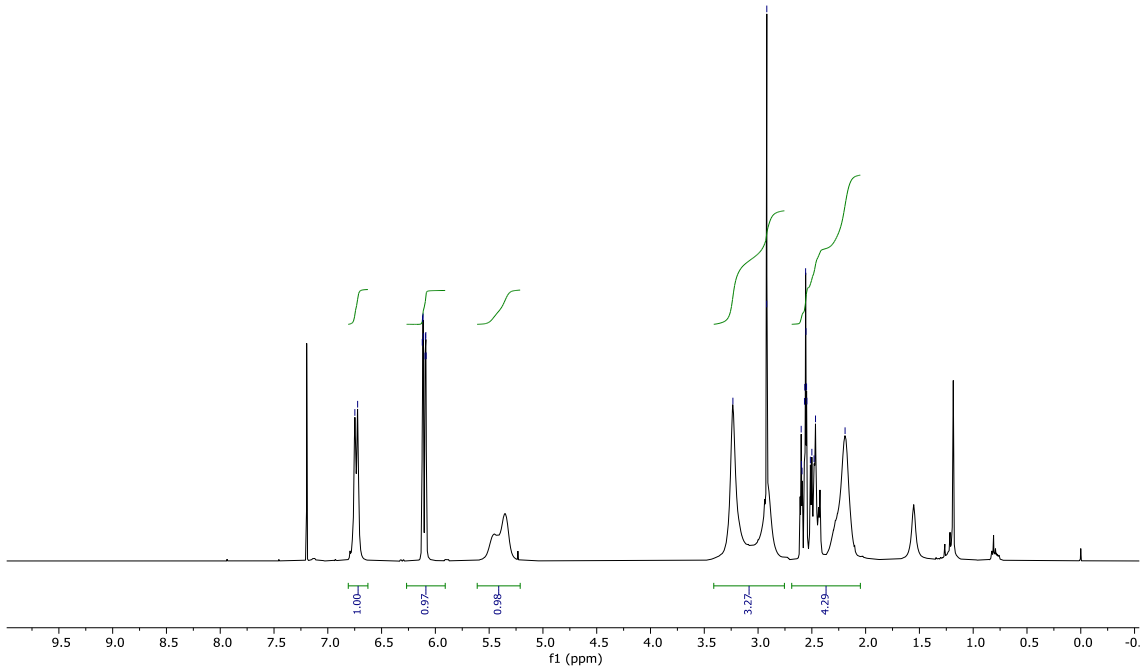

23020202\_B400FA\_07022023\_XGT820-9.2.fid  
 Equip: B400F / N.Inv: 1037597  
 N.Reg: 23020202  
 Usuari: san / Mostra: XGT820-9  
 Nom: GISELA TRENCHS MIR  
 Data: 07/02/2023 02:30:34 h./ Ope.: AUTOSERVEI  
 Experiment: A-C13-zgg30 Solvent: CDCl3

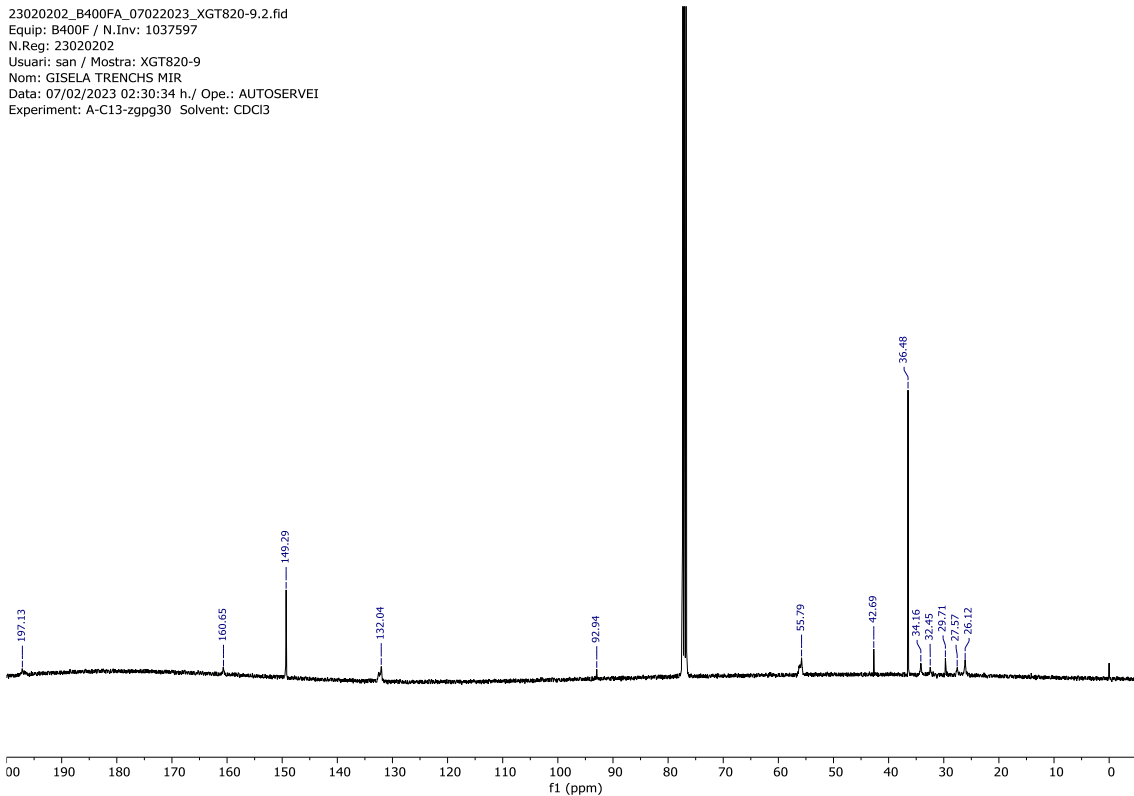

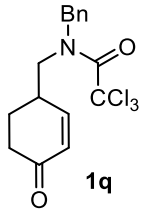

22060552\_B400FA\_15062022\_XGT501-31.2.fid  
 Equip: B400F / N.Inv: 1037597  
 N.Reg: 22060552  
 Usuari: san / Mostra: XGT501-31  
 Nom: FAIZA DIABA NOUARA  
 Data: 14/06/2022 08:35:37 h./ Ope.: AUTOSERVEI  
 Experiment: A-H1-zg30 Solvent: CDCl3

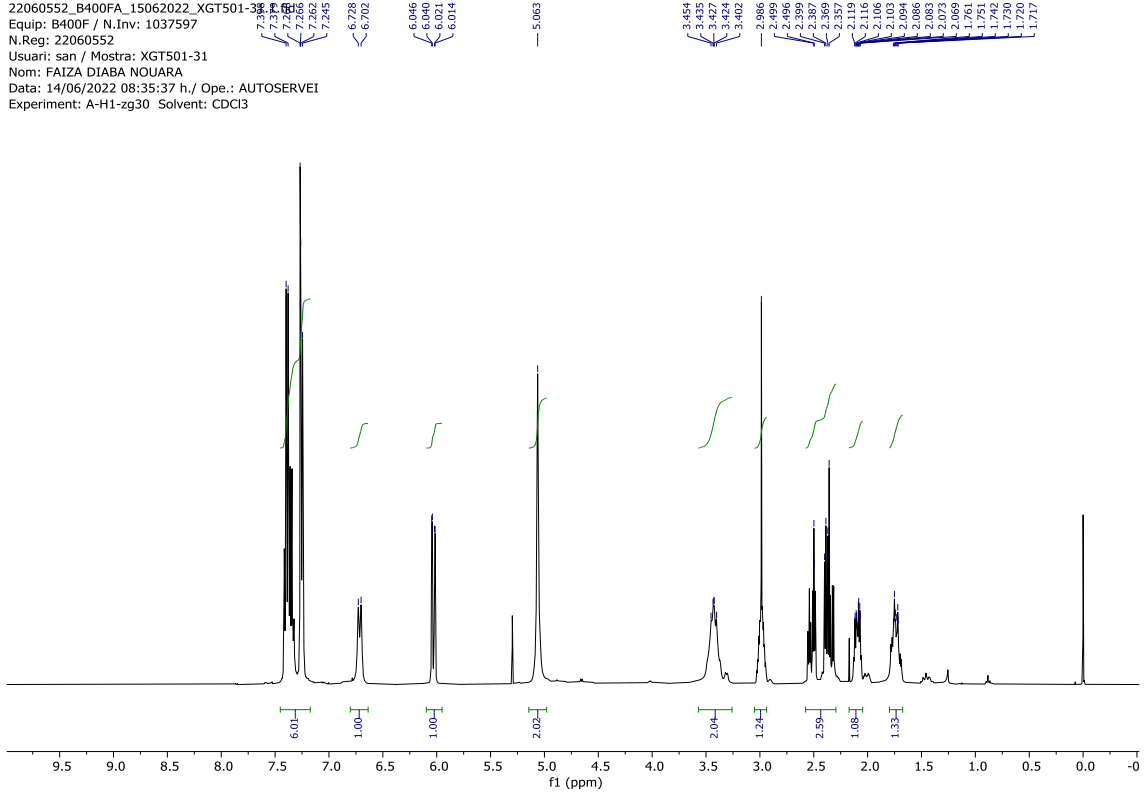

22060552\_B400FA\_15062022\_XGT501-31.2.fid  
 Equip: B400F / N.Inv: 1037597  
 N.Reg: 22060552  
 Usuari: san / Mostra: XGT501-31  
 Nom: FAIZA DIABA NOUARA  
 Data: 15/06/2022 06:05:20 h./ Ope.: AUTOSERVEI  
 Experiment: A-C13-zgpg30 Solvent: CDCl3

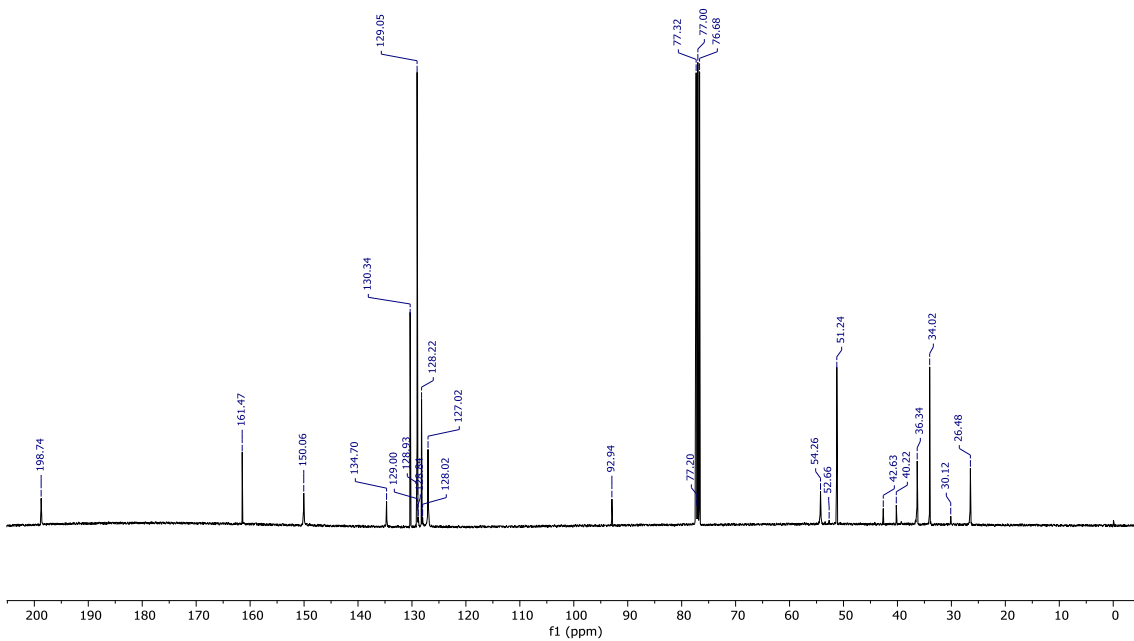

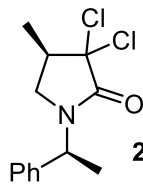

**2e** (diastereomer less polar)

M400APCB\_18112021\_XGT455-26-H1  
 M400PCB / Num.Inv. AF/002630  
 cdc13 / Temp: 25C / N.Reg: XXXXXXXXXXXX  
 Usuari: san / Mostra: XGT455-26  
 Nom: GISELA TRENCHS MIR  
 Data: 17/11/21 / Ope.: G.TRENCHS

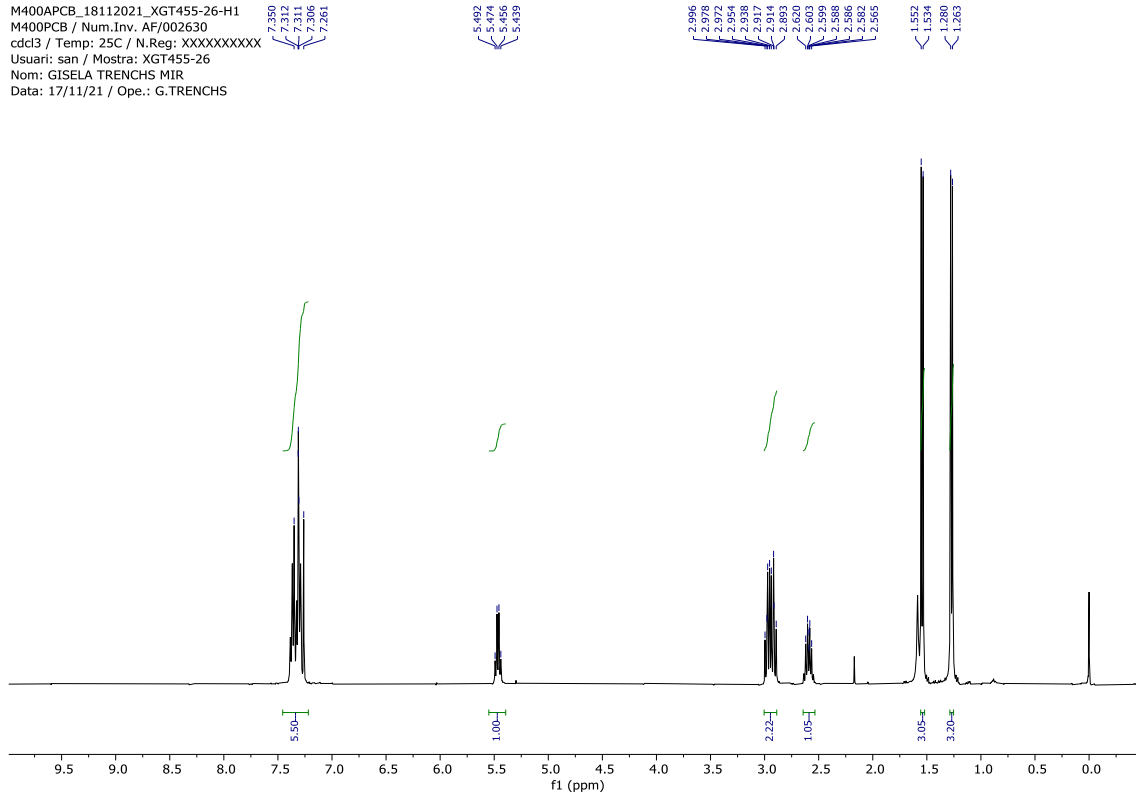

M400APCB\_18112021\_XGT455-26-C13  
 M400PCB / Num.Inv. AF/002630  
 cdc13 / Temp: 25C / N.Reg: XXXXXXXXXXXX  
 Usuari: san / Mostra: XGT455-26  
 Nom: GISELA TRENCHS MIR  
 Data: 17/11/21 / Ope.: G.TRENCHS

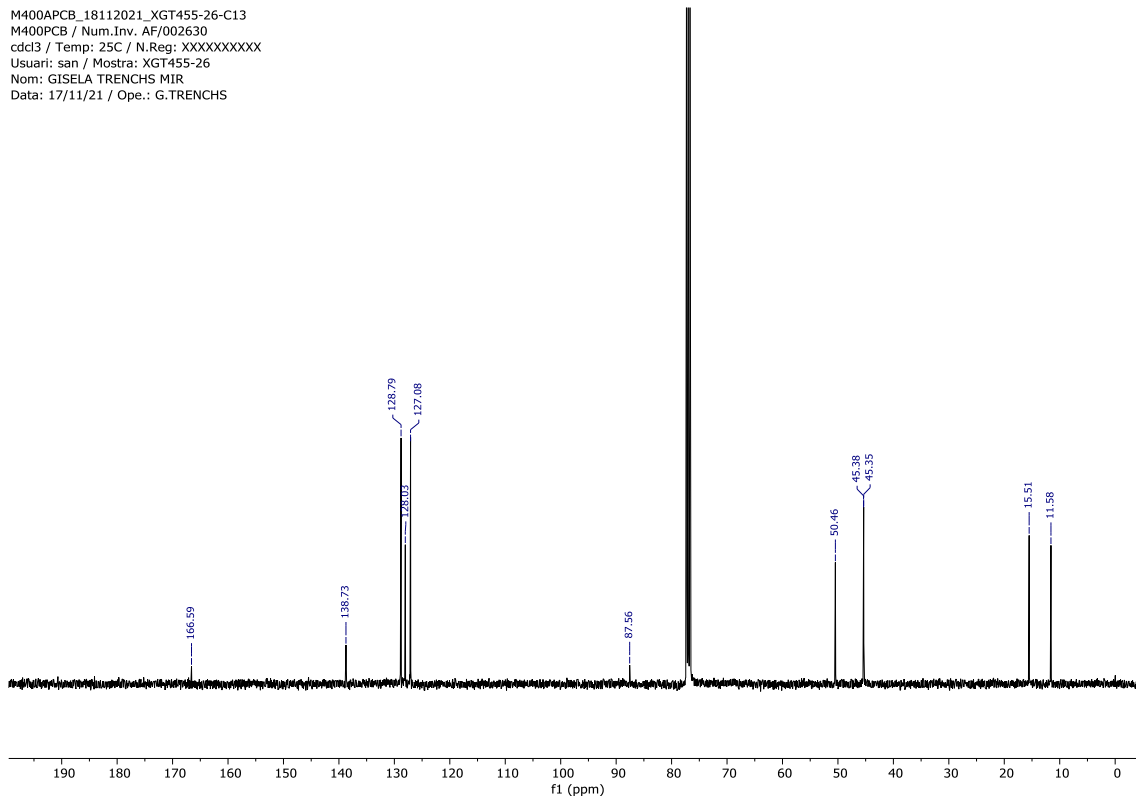

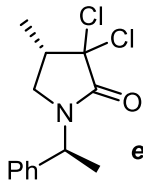

**epi-2e** (diastereomer more polar)

GT455-54/XGT739-82-1H7  
 Equip: B400F / N.Inv: 1037597  
 N.Reg: 23010544  
 Usuari: san / Mostra: XGT739-82  
 Nom: GISELA TRENCHS MIR  
 Data: 19/01/2023 16:56:11 h./ Ope.: AUTOSERVEI  
 Experiment: A-H1-zg30 Solvent: CDCl3

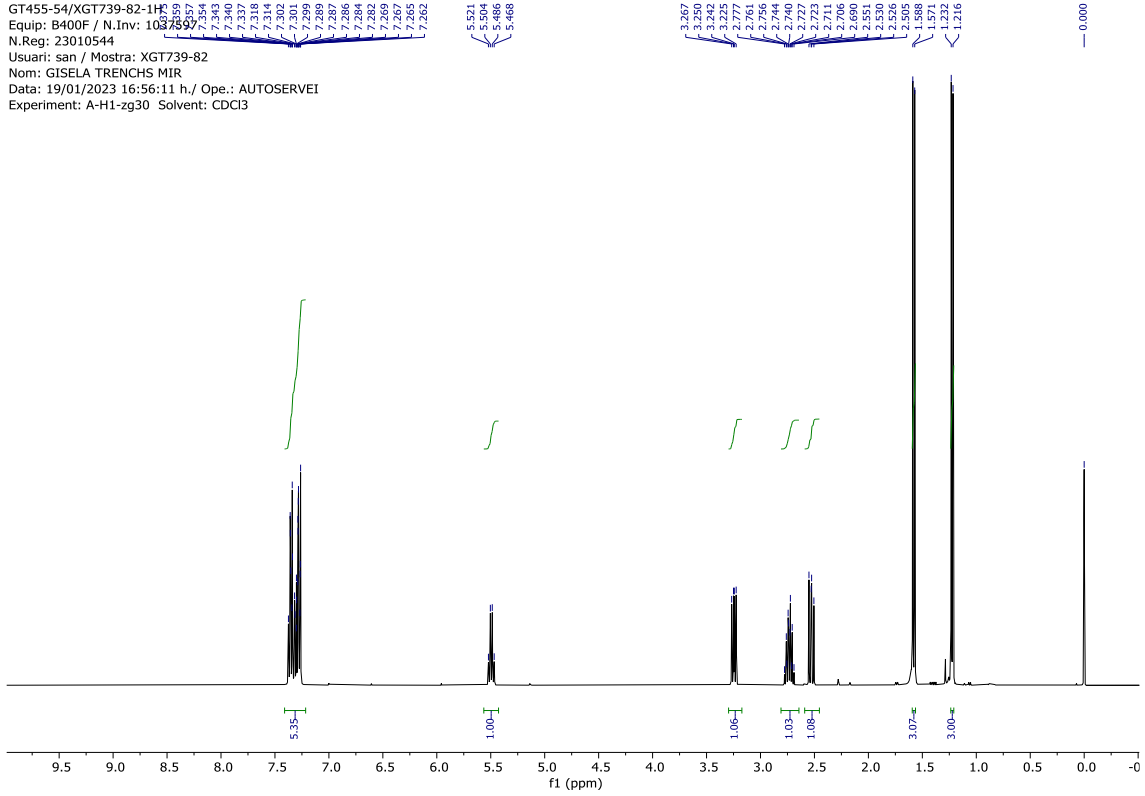

GT455-54/XGT739-82-13C  
 Equip: B400F / N.Inv: 1037597  
 N.Reg: 23010544  
 Usuari: san / Mostra: XGT739-82  
 Nom: GISELA TRENCHS MIR  
 Data: 20/01/2023 01:35:06 h./ Ope.: AUTOSERVEI  
 Experiment: A-C13-zgpg30 Solvent: CDCl3

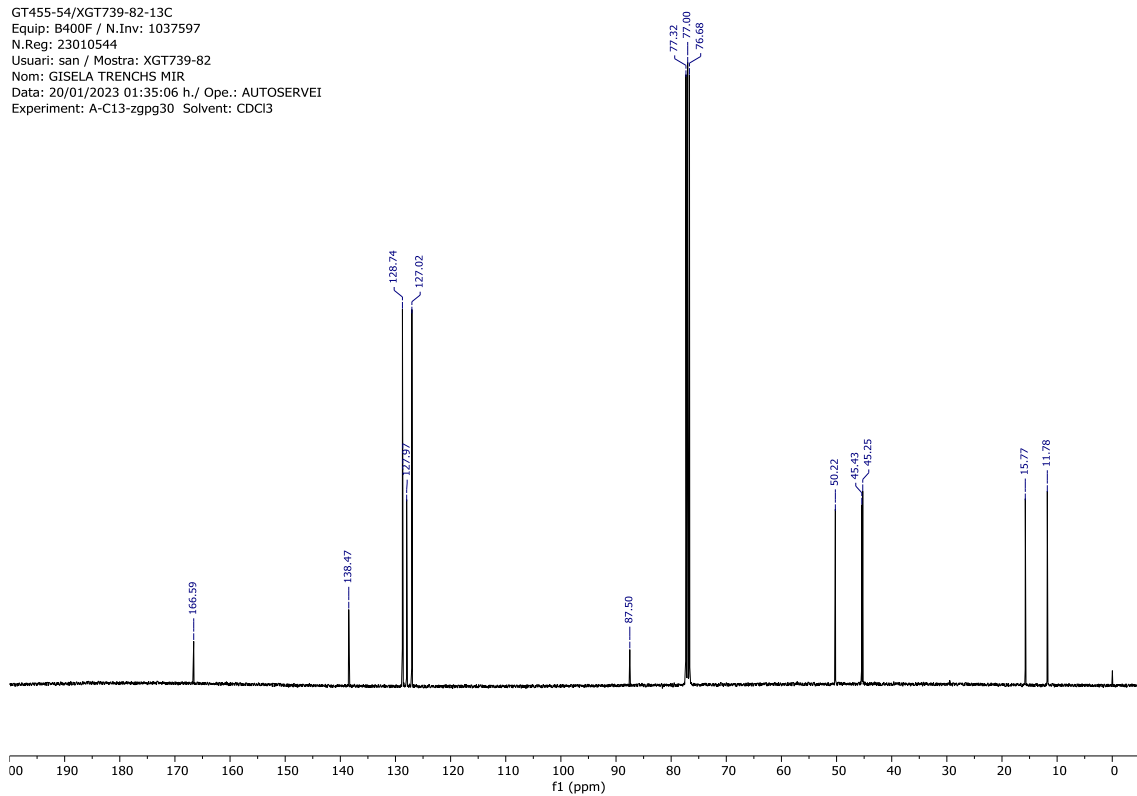

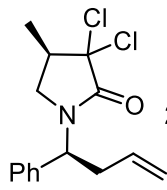

**2f** (diastereomer less polar)

M400APCB\_16112021\_XGT451-34-21-C13  
M400PCB / Num.Inv. AF/002630  
cdcl3 / Temp: 25C / N.Reg: XXXXXXXXXX  
Usuari: san / Mostra: XGT451-34-21  
Nom: GISELA TRENCHS MIR  
Data: 16/11/21 / Ope.: G.TRENCHS

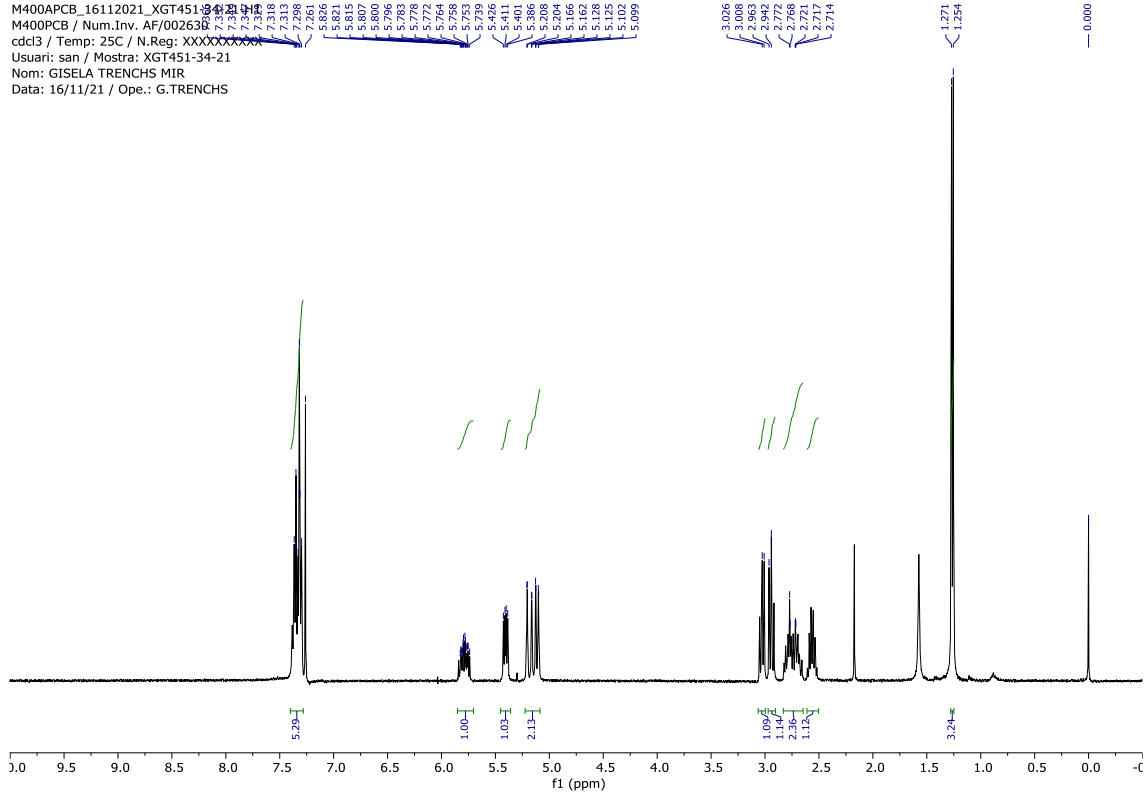

M400APCB\_16112021\_XGT451-34-21-C13  
M400PCB / Num.Inv. AF/002630  
cdcl3 / Temp: 25C / N.Reg: XXXXXXXXXX  
Usuari: san / Mostra: XGT451-34-21  
Nom: GISELA TRENCHS MIR  
Data: 16/11/21 / Ope.: G.TRENCHS

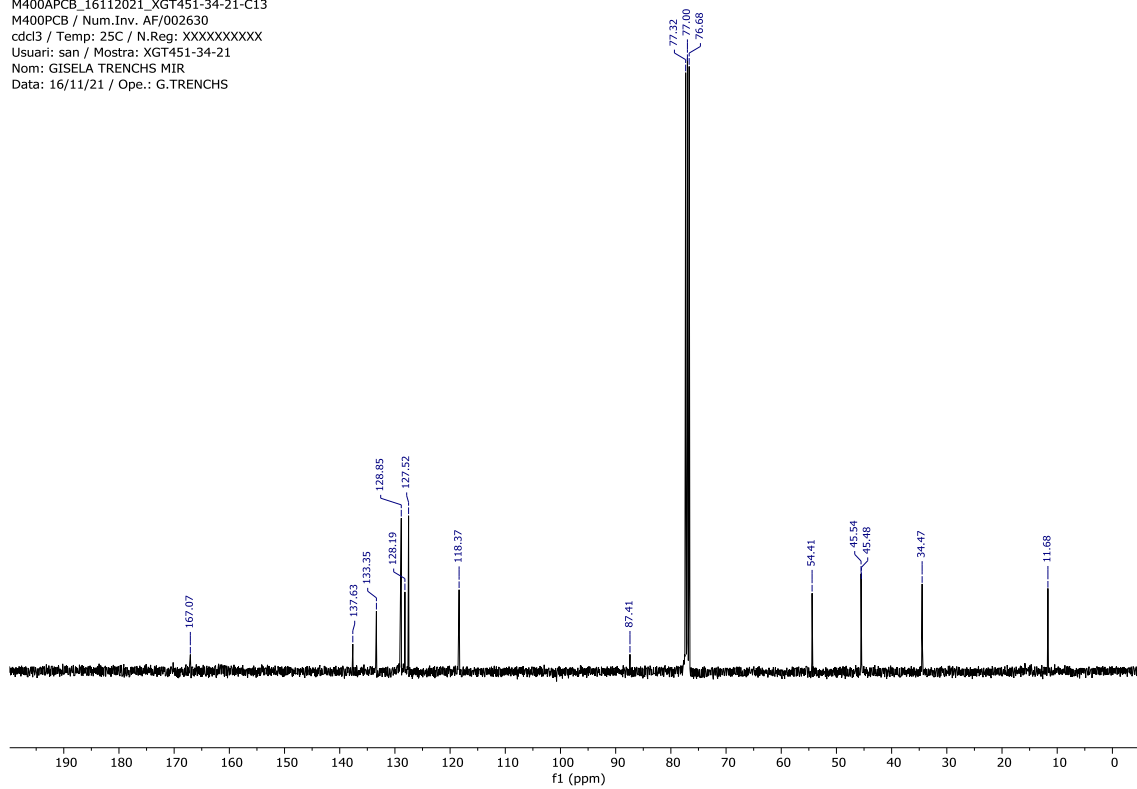



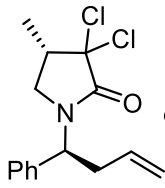

**epi-2f** (diastereomer more polar)

23030852\_B400FA\_24032023\_GT838-13.2.fid  
 Equip: B400F / N.Inv: 1037597  
 N.Reg: 23030852  
 Usuari: san / Mostra: GT838-13  
 Nom: GISELA TRENCHS MIR  
 Data: 23/03/2023 13:32:35 h./ Ope.: AUTOSERVEI  
 Experiment: A-H1-zg30 Solvent: CDCl3

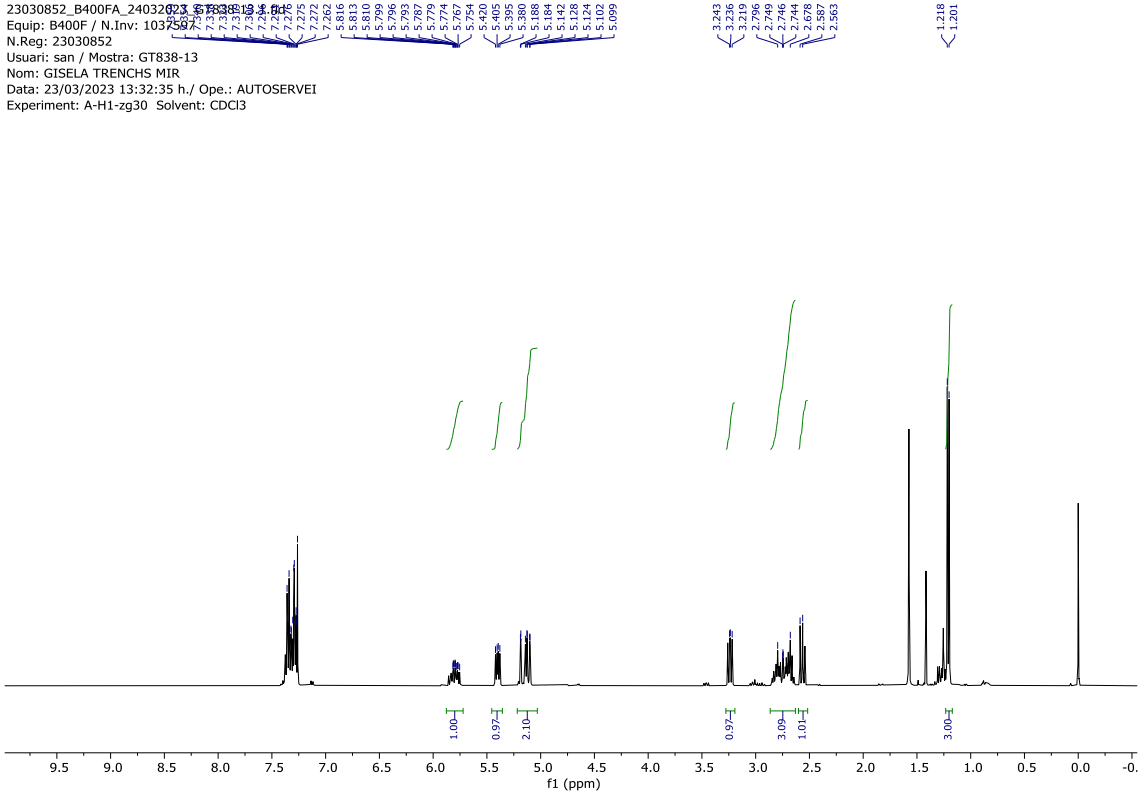

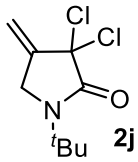

23030441\_B400FA\_15032023\_XGT312-4.1.fid  
 Equip: B400F / N.Inv: 1037597  
 N.Reg: 23030441  
 Usuari: san / Mostra: XGT312-4  
 Nom: GISELA TRENCHS MIR  
 Data: 14/03/2023 09:57:19 h./ Ope.: AUTOSERVEI  
 Experiment: A-H1-zg30 Solvent: CDCl3

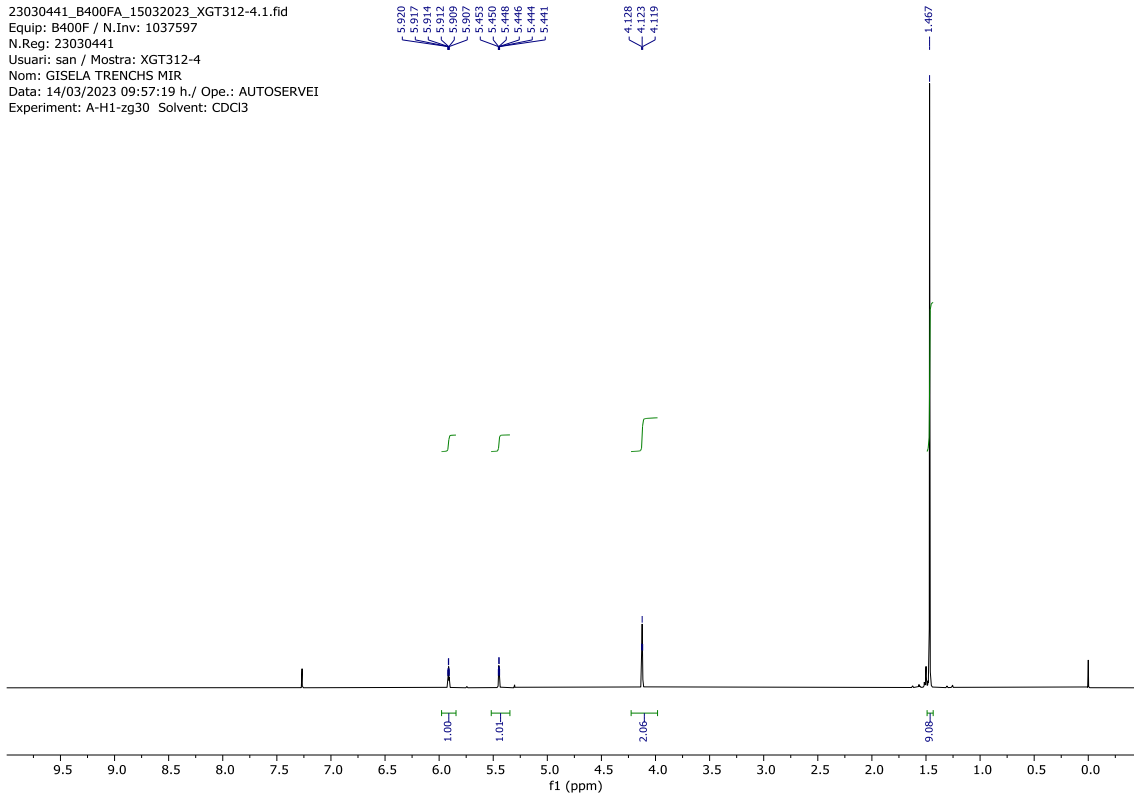

23030441\_B400FA\_15032023\_XGT312-4.2.fid  
 Equip: B400F / N.Inv: 1037597  
 N.Reg: 23030441  
 Usuari: san / Mostra: XGT312-4  
 Nom: GISELA TRENCHS MIR  
 Data: 15/03/2023 05:38:56 h./ Ope.: AUTOSERVEI  
 Experiment: A-C13-zgpg30 Solvent: CDCl3

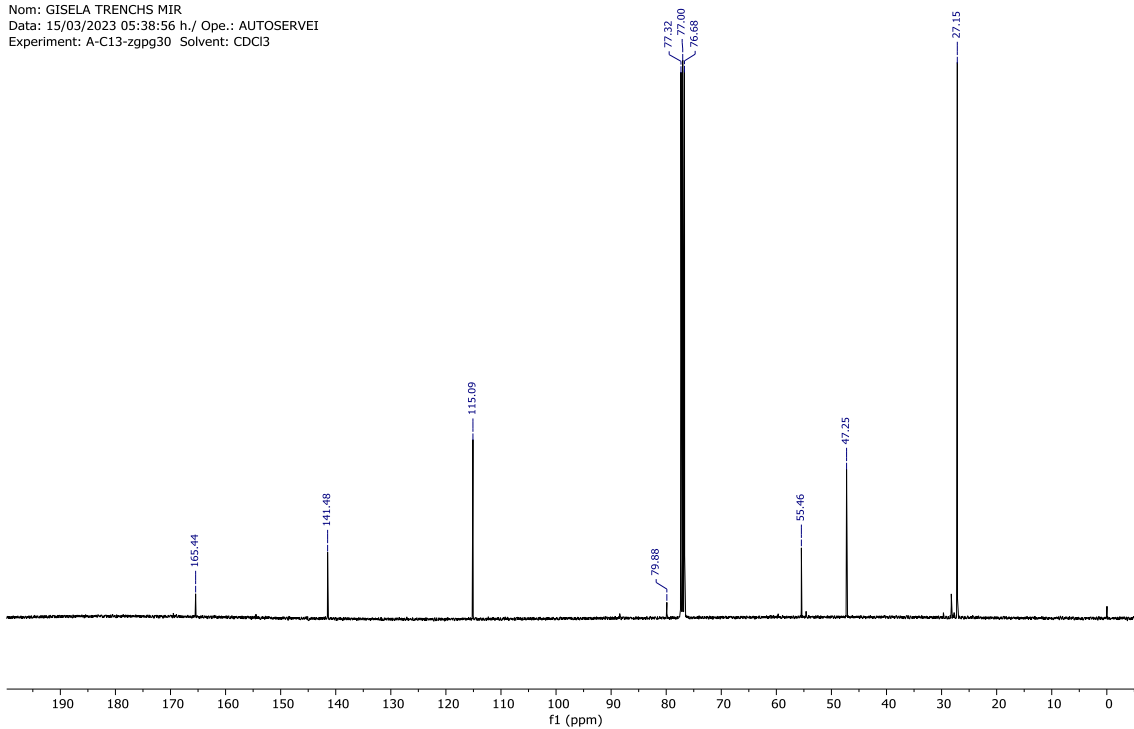



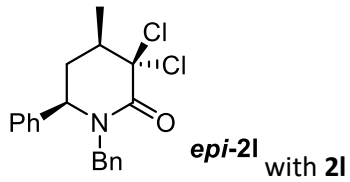

23030568\_B400FA\_16032023\_XGT836-12.1.fid  
 Equip: B400F / N.Inv: 1037597  
 N.Reg: 23030568  
 Usuari: san / Mostra: XGT836-12  
 Nom: GISELA TRENCHS MIR  
 Data: 16/03/2023 15:51:06 h./ Ope.: AUTOSERVEI  
 Experiment: A-H1-zg30 Solvent: CDCl3

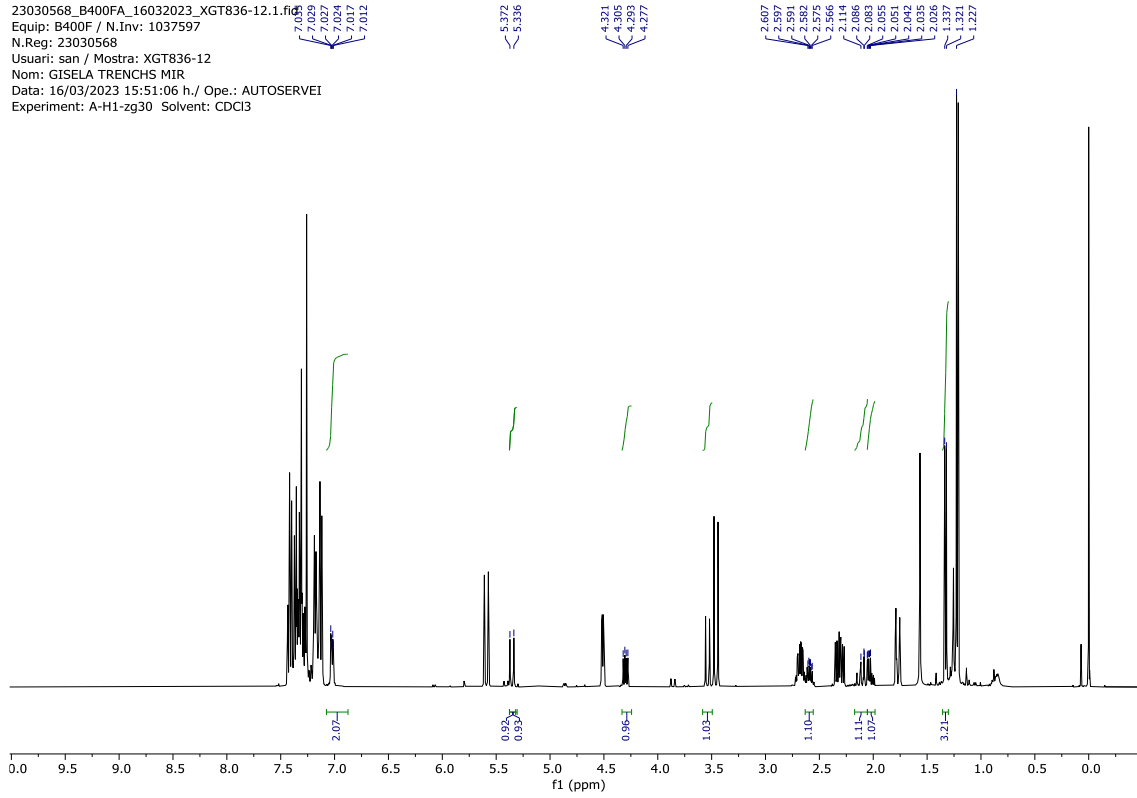

23030568\_B400FA\_17032023\_XGT836-12.2.fid  
 Equip: B400F / N.Inv: 1037597  
 N.Reg: 23030568  
 Usuari: san / Mostra: XGT836-12  
 Nom: GISELA TRENCHS MIR  
 Data: 17/03/2023 06:22:48 h./ Ope.: AUTOSERVEI  
 Experiment: A-C13-zgpg30 Solvent: CDCl3

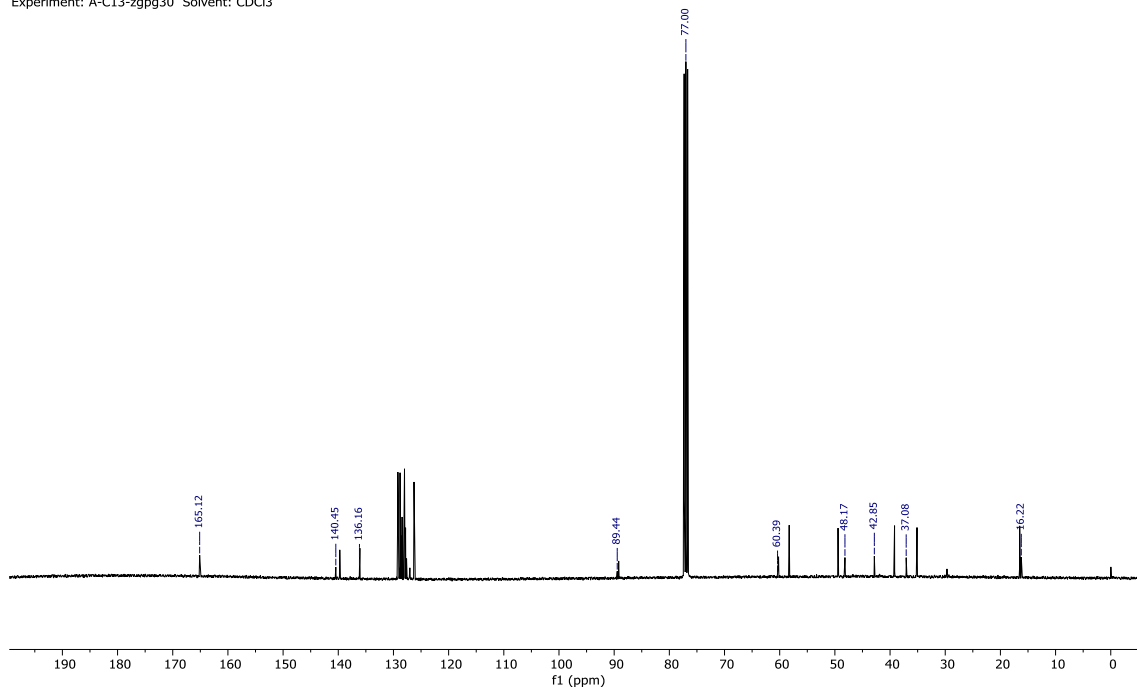

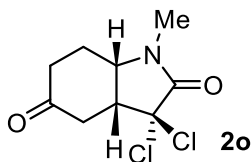

GT818-47-14/1H  
 Equip: B400F / N.Inv: 1037597  
 N.Reg: 23020177

Usuari: san / Mostra: XGT818-47-14  
 Nom: GISELA TRENCHS MIR  
 Data: 06/02/2023 10:10:37 h./ Ope.: AUTOSERVEI  
 Experiment: A-H1-zg30 Solvent: CDCl3

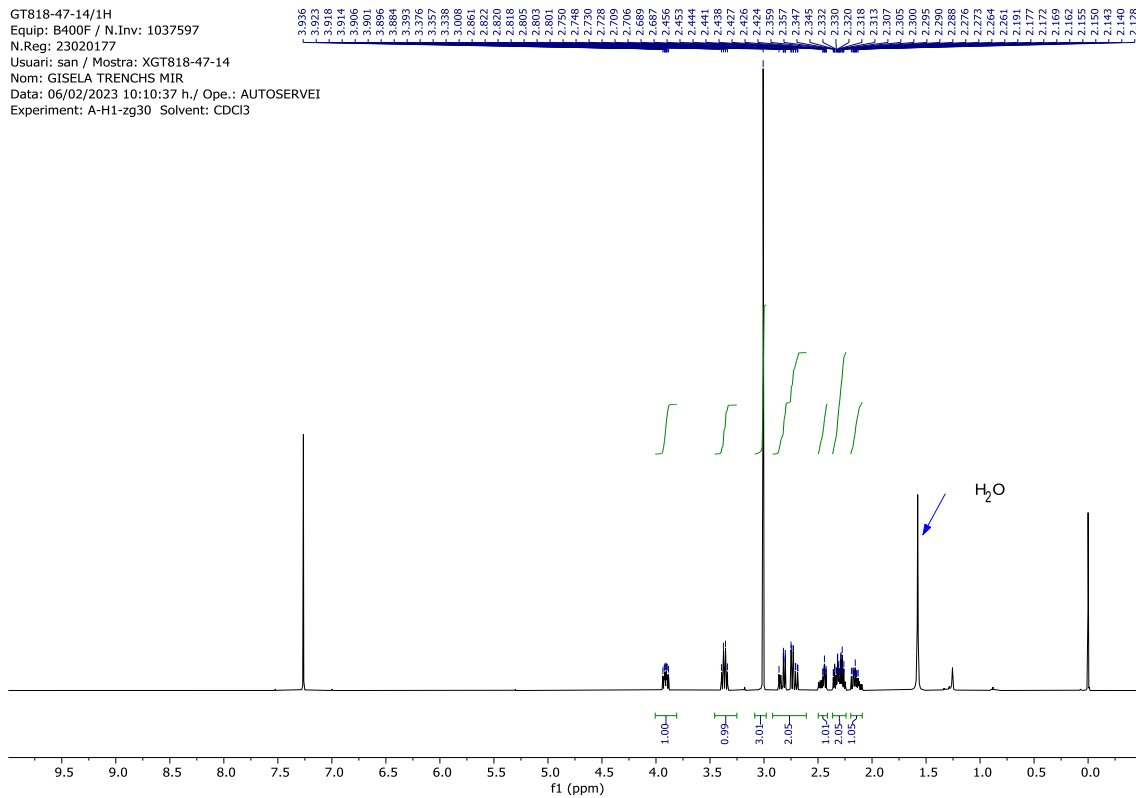

GT818-47-14/13C  
 Equip: B400F / N.Inv: 1037597  
 N.Reg: 23020177  
 Usuari: san / Mostra: XGT818-47-14  
 Nom: GISELA TRENCHS MIR  
 Data: 06/02/2023 23:31:39 h./ Ope.: AUTOSERVEI  
 Experiment: A-C13-zgpg30 Solvent: CDCl3

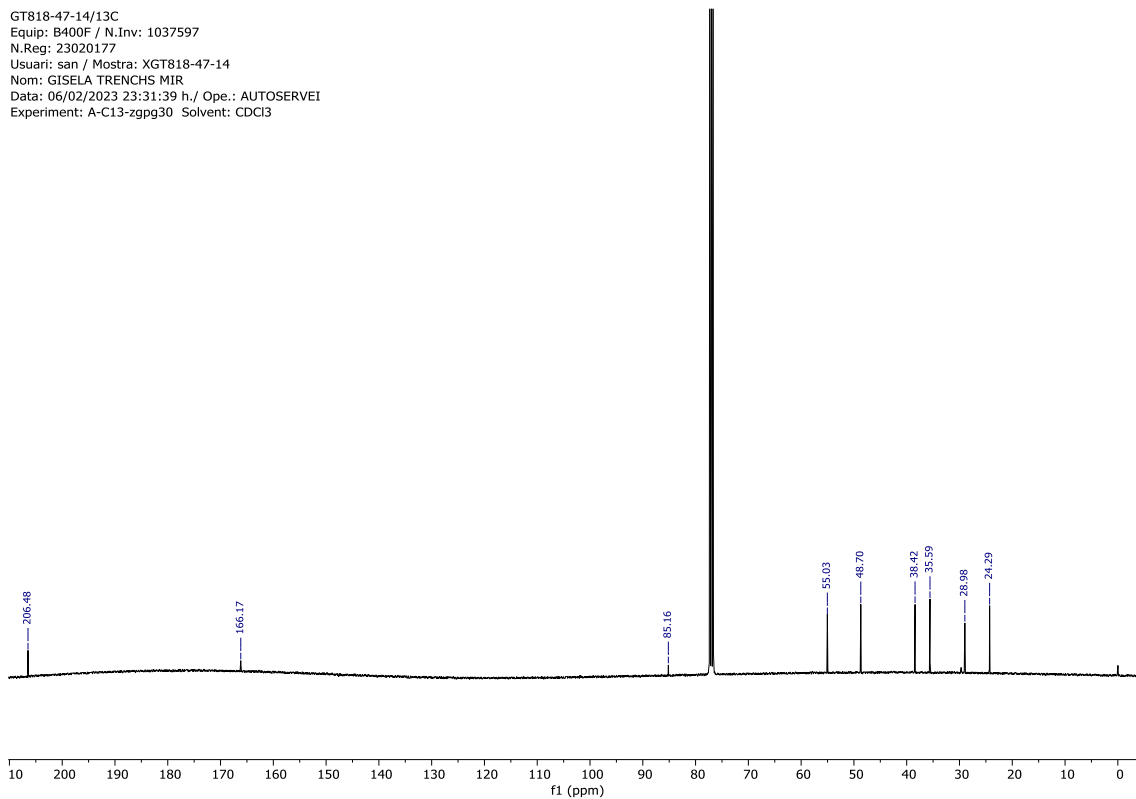

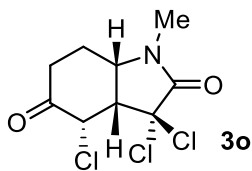

23020635\_B400FA\_15022023\_XGT818-26-11.2.fid  
 Equip: B400F / N.Inv: 1037597  
 N.Reg: 23020635  
 Usuari: san / Mostra: XGT818-26-11  
 Nom: GISELA TRENCHS MIR  
 Data: 15/02/2023 18:57:52 h./ Ope.: AUTOSERVEI  
 Experiment: A-H1-zg30 Solvent: CDCl3

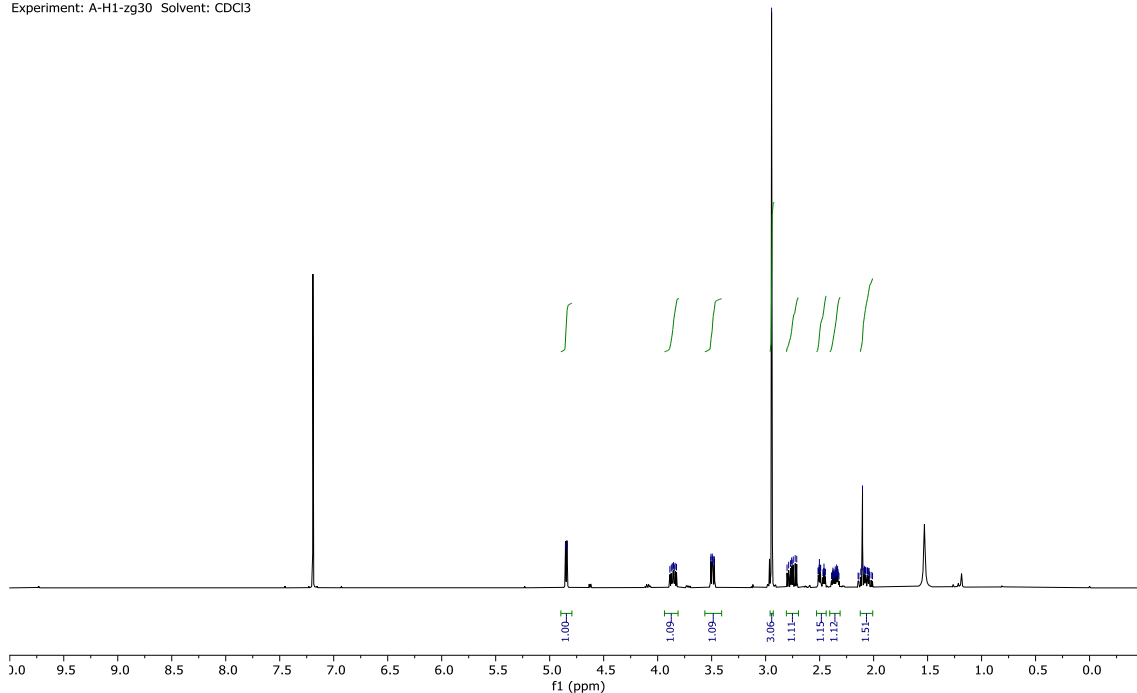

23020635\_B400FA\_15022023\_XGT818-26-11.2.fid  
 Equip: B400F / N.Inv: 1037597  
 N.Reg: 23020635  
 Usuari: san / Mostra: XGT818-26-11  
 Nom: GISELA TRENCHS MIR  
 Data: 15/02/2023 21:06:32 h./ Ope.: AUTOSERVEI  
 Experiment: A-C13-zgpg30 Solvent: CDCl3

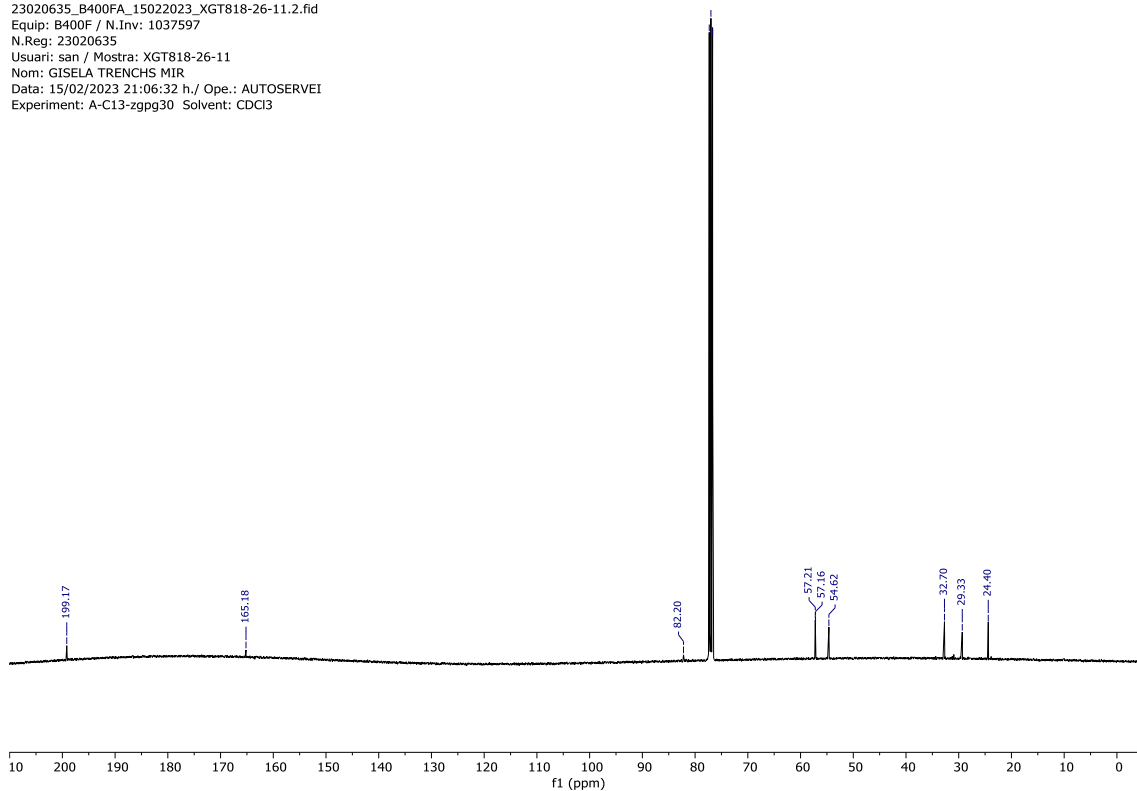

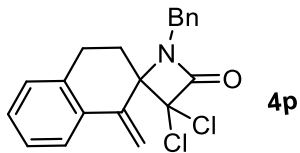

23070656\_B400FA\_21072023\_TGT932-31-17.2.fid  
 Equip: B400F / N.Inv: 1037597  
 N.Reg: 23070656  
 Usuari: san / Mostra: TGT932-31-17  
 Nom: FAIZA DIABA NOUARA  
 Data: 21/07/2023 13:29:00 h./ Ope.: AUTOSERVEI  
 Experiment: A-H1-zg30 Solvent: CDCl3

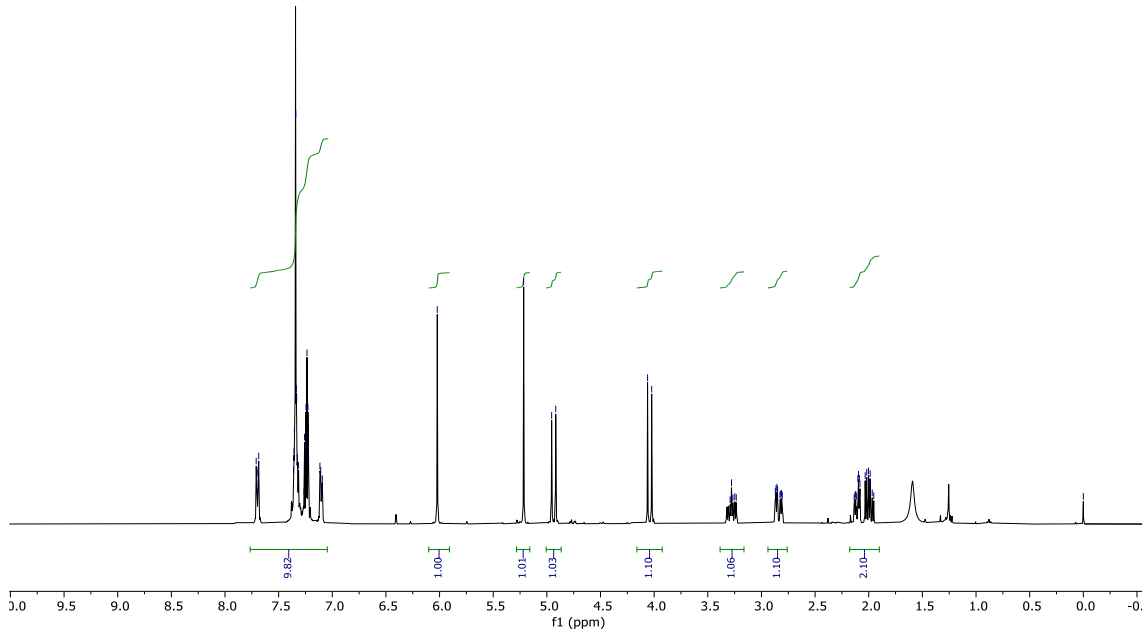

23070656\_B400FA\_21072023\_TGT932-31-17.2.fid  
 Equip: B400F / N.Inv: 1037597  
 N.Reg: 23070656  
 Usuari: san / Mostra: TGT932-31-17  
 Nom: FAIZA DIABA NOUARA  
 Data: 21/07/2023 23:35:22 h./ Ope.: AUTOSERVEI  
 Experiment: A-C13-zgpg30 Solvent: CDCl3

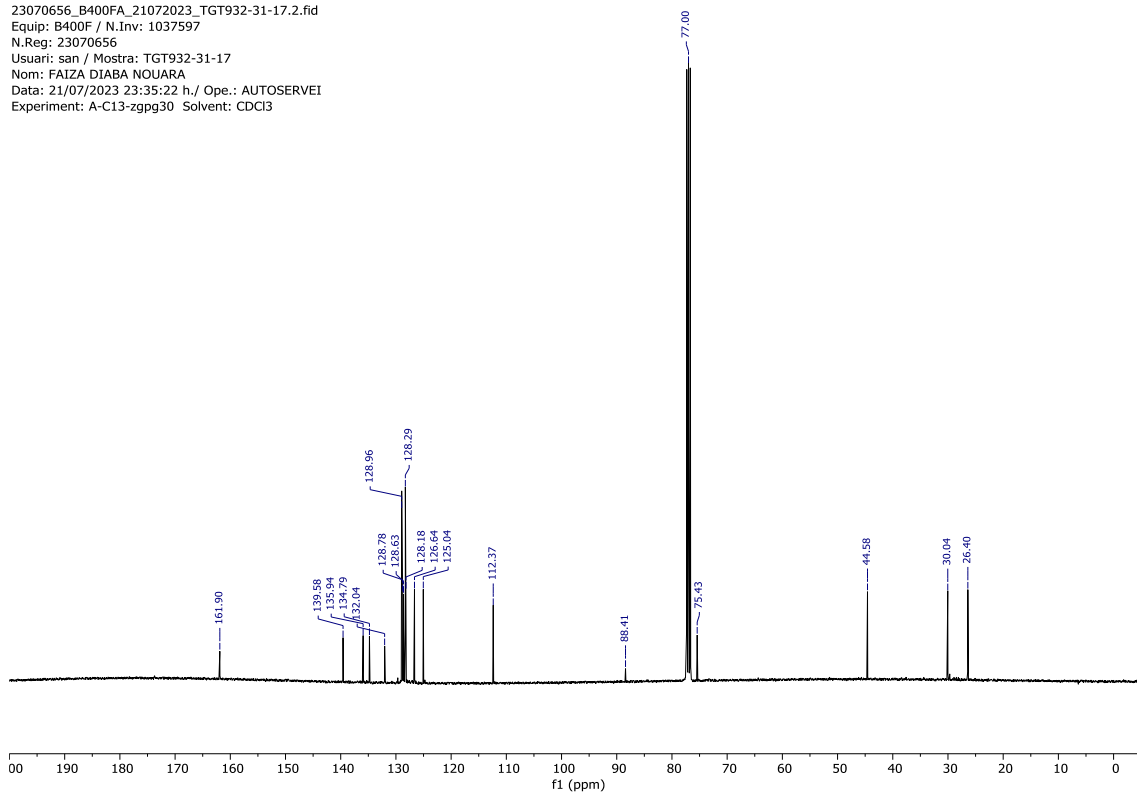





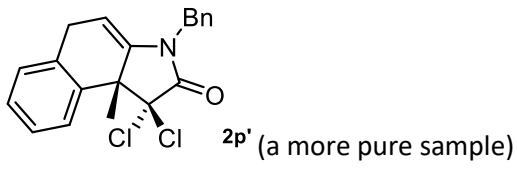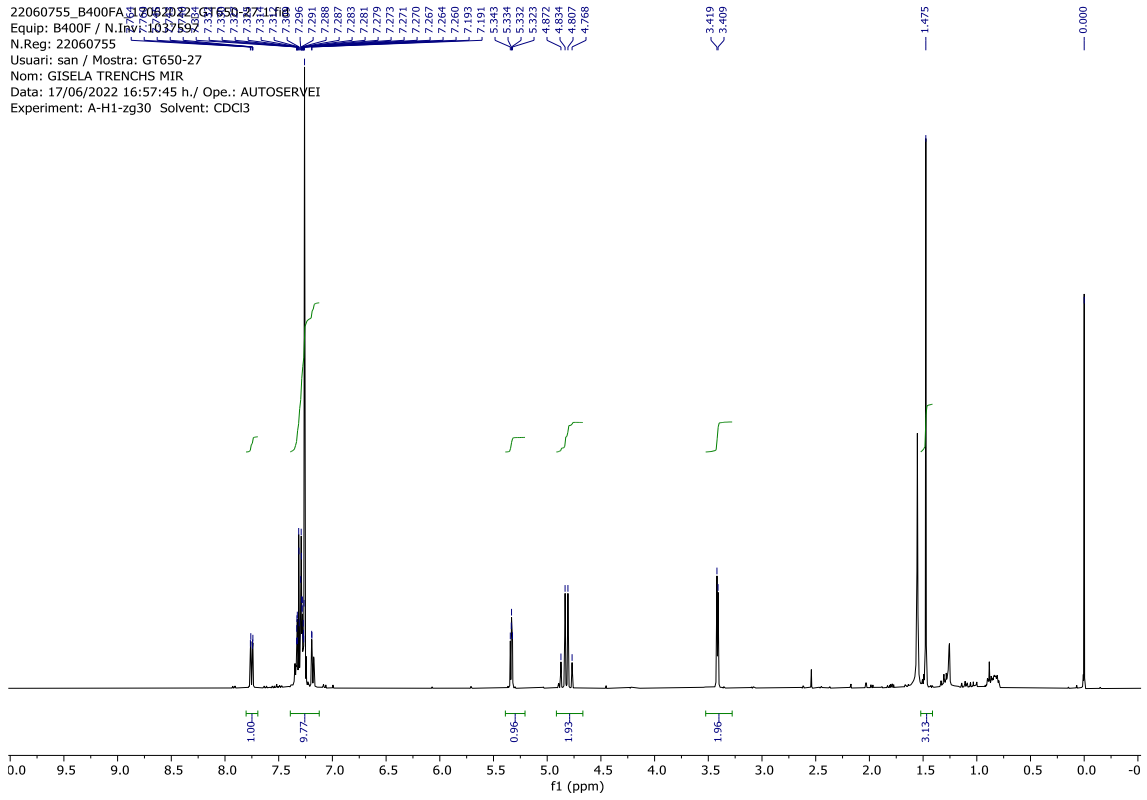



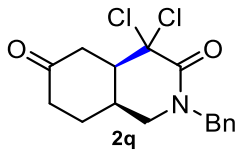

22070022\_B400FA\_01072022\_XGT667-8.2.fid  
 Equip: B400F / N.Inv: 1037597  
 N.Reg: 22070022  
 Usuari: san / Mostra: XGT667-8  
 Nom: GISELA TRENCHS MIR  
 Data: 01/07/2022 14:26:02 h./ Ope.: AUTOSERVEI  
 Experiment: A-H1-zg30 Solvent: CDCl3

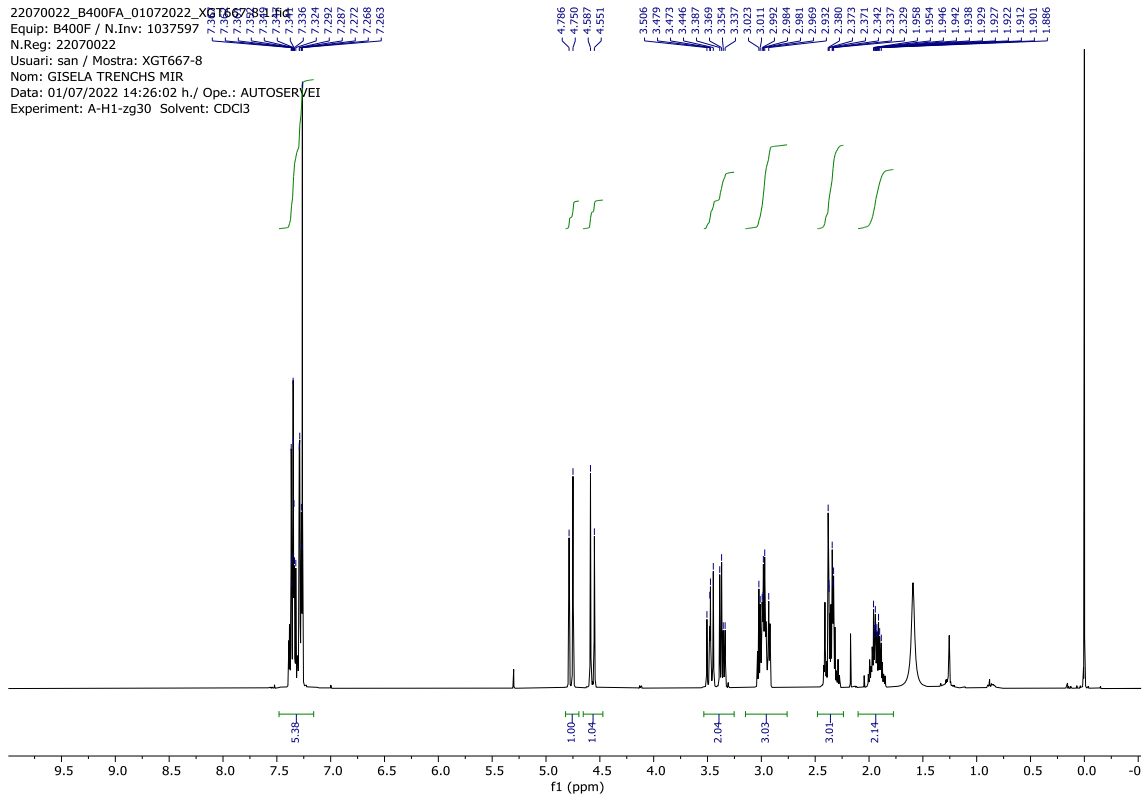

22070022\_B400FA\_01072022\_XGT667-8.2.fid  
 Equip: B400F / N.Inv: 1037597  
 N.Reg: 22070022  
 Usuari: san / Mostra: XGT667-8  
 Nom: GISELA TRENCHS MIR  
 Data: 01/07/2022 23:06:21 h./ Ope.: AUTOSERVEI  
 Experiment: A-C13-zgpg30 Solvent: CDCl3

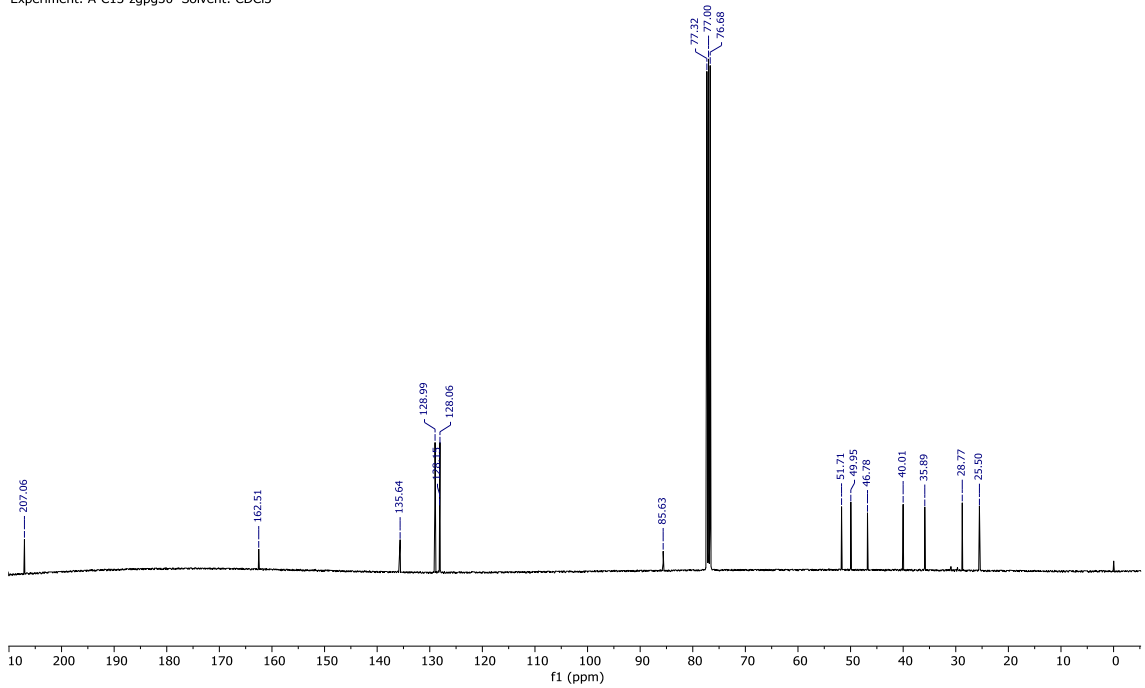

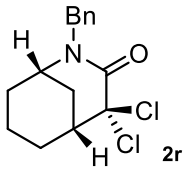

23010069\_B400FA\_10012023\_XGT789-38.2.fid  
 Equip: B400F / N.Inv: 1037597  
 N.Reg: 23010069  
 Usuari: san / Mostra: XGT789-38  
 Nom: GISELA TRENCHS MIR  
 Data: 09/01/2023 12:40:07 h./ Ope.: AUTOSERVEI  
 Experiment: A-H1-zg30 Solvent: CDCl3

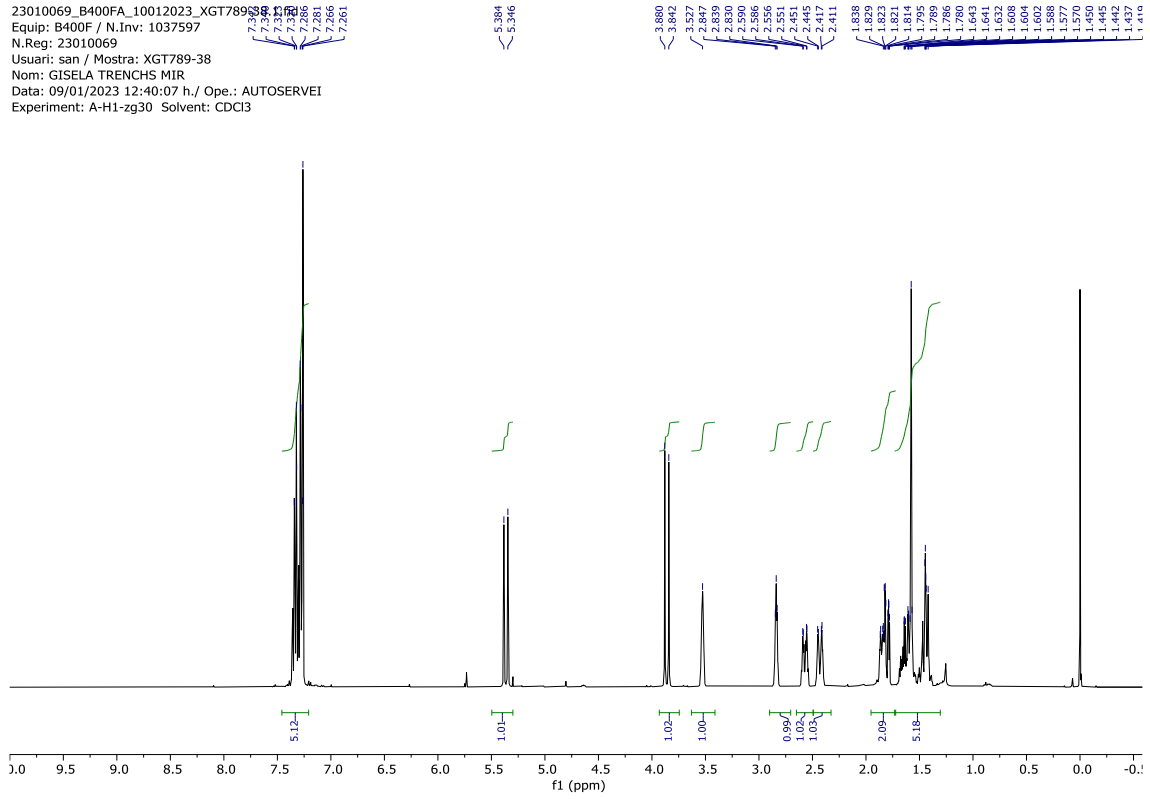

23010069\_B400FA\_10012023\_XGT789-38.2.fid  
 Equip: B400F / N.Inv: 1037597  
 N.Reg: 23010069  
 Usuari: san / Mostra: XGT789-38  
 Nom: GISELA TRENCHS MIR  
 Data: 10/01/2023 04:53:17 h./ Ope.: AUTOSERVEI  
 Experiment: A-C13-zgpg30 Solvent: CDCl3

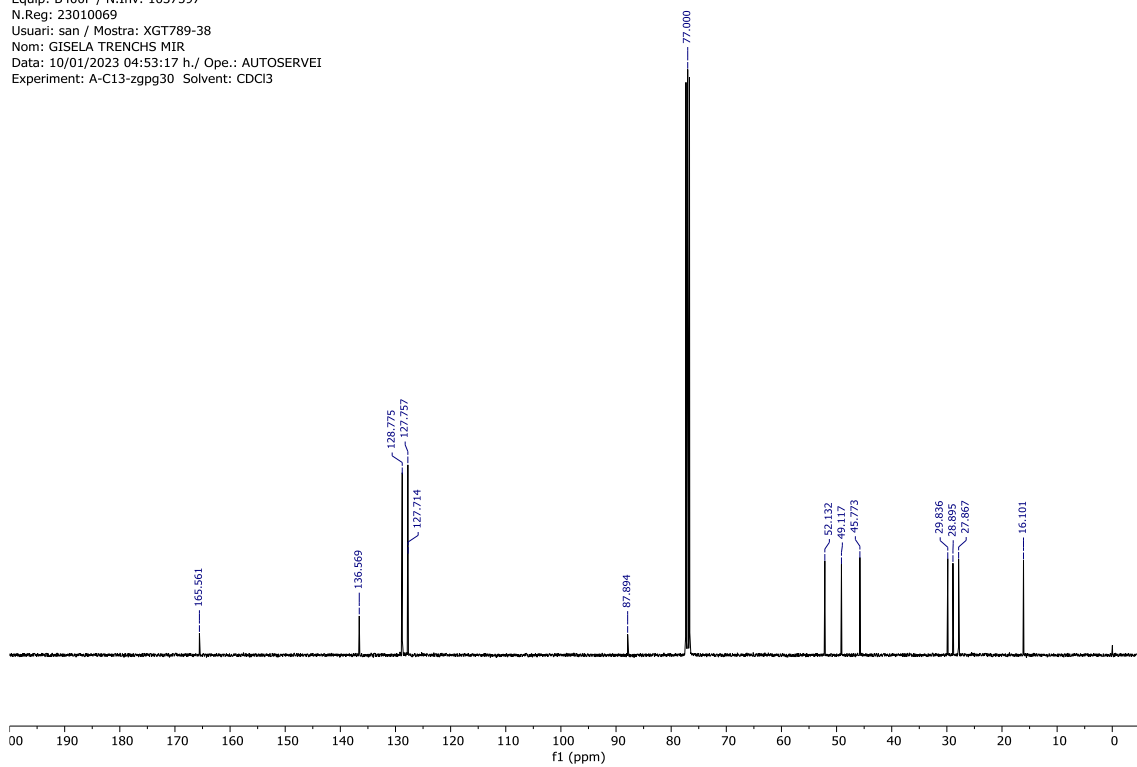

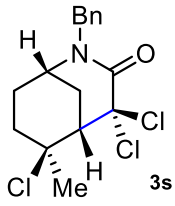

GT807-22/1H  
 Equip: B400F / N.Inv: 1037597  
 N.Reg: 23010536  
 Usuari: san / Mostra: XGT807-22  
 Nom: GISELA TRENCHS MIR  
 Data: 19/01/2023 14:54:46 h./ Ope.: AUTOSERVEI  
 Experiment: A-H1-zg30 Solvent: CDCl3

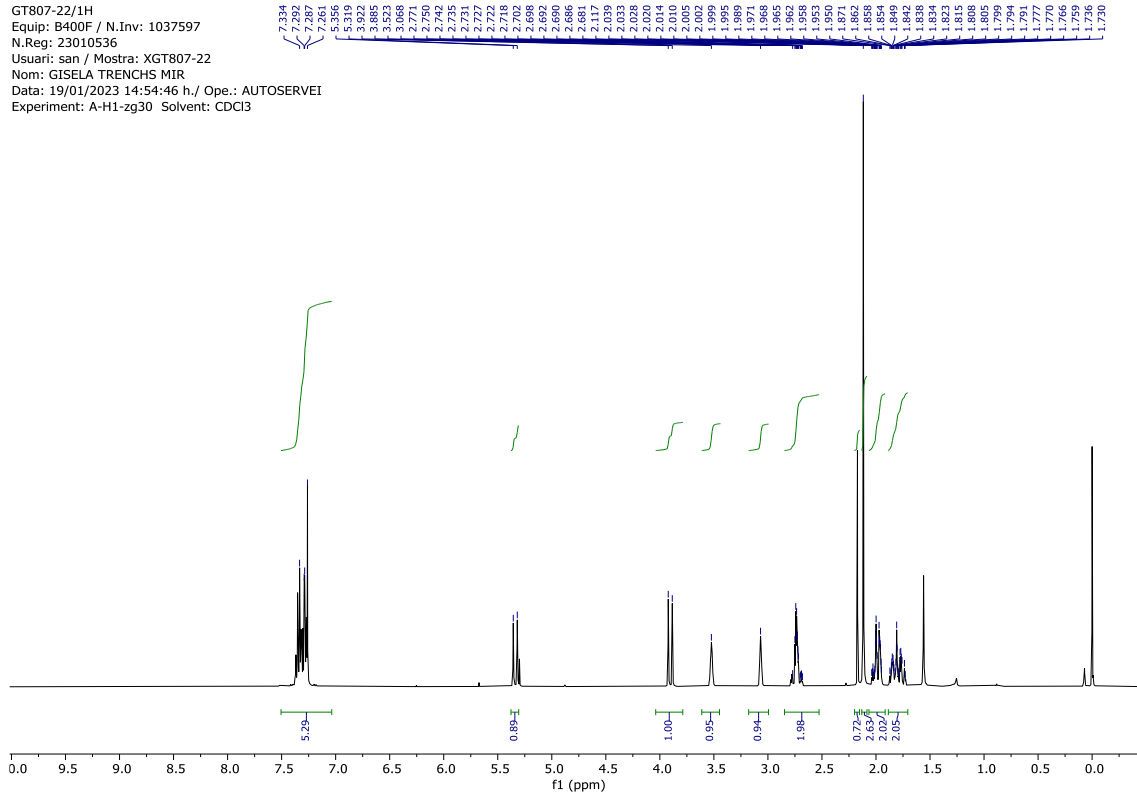

GT807-22/13C  
 Equip: B400F / N.Inv: 1037597  
 N.Reg: 23010536  
 Usuari: san / Mostra: XGT807-22  
 Nom: GISELA TRENCHS MIR  
 Data: 20/01/2023 00:47:07 h./ Ope.: AUTOSERVEI  
 Experiment: A-C13-zgpg30 Solvent: CDCl3

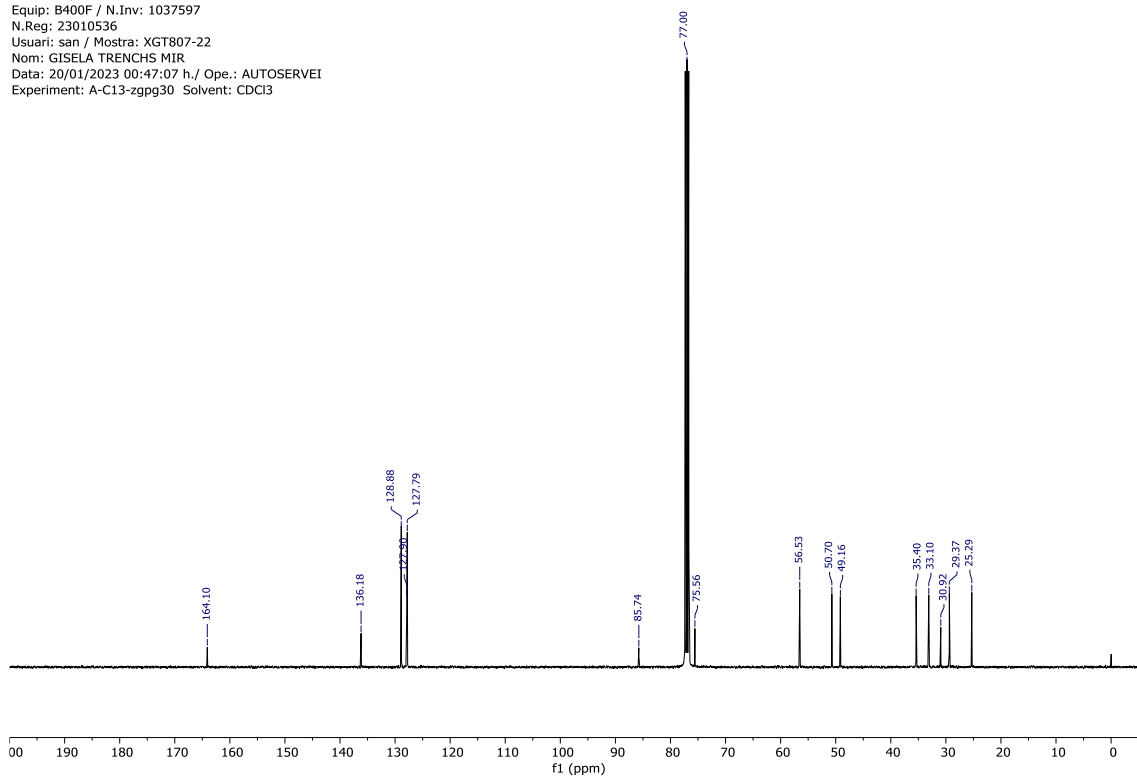

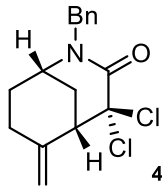

23010440\_B400FA\_18012023\_xtan841-65.1.fid  
 Equip: B400F / N.Inv: 1037597  
 N.Reg: 23010440  
 Usuari: san / Mostra: xtan841-65  
 Nom: FAIZA DIABA NOUARA  
 Data: 17/01/2023 18:41:54 h./ Ope.: AUTOSERVEI  
 Experiment: A-H1-zg30 Solvent: CDCl3

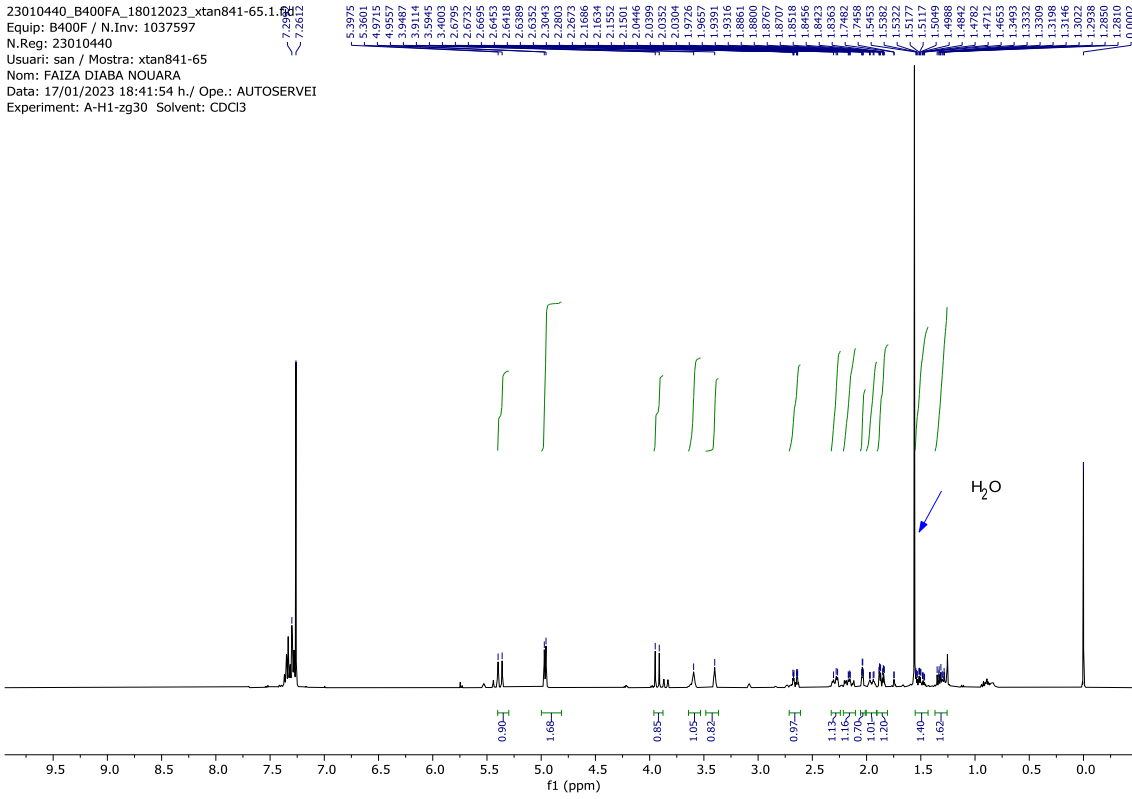

23010440\_B400FA\_18012023\_xtan841-65.2.fid  
 Equip: B400F / N.Inv: 1037597  
 N.Reg: 23010440  
 Usuari: san / Mostra: xtan841-65  
 Nom: FAIZA DIABA NOUARA  
 Data: 18/01/2023 01:31:46 h./ Ope.: AUTOSERVEI  
 Experiment: A-C13-zgpg30 Solvent: CDCl3

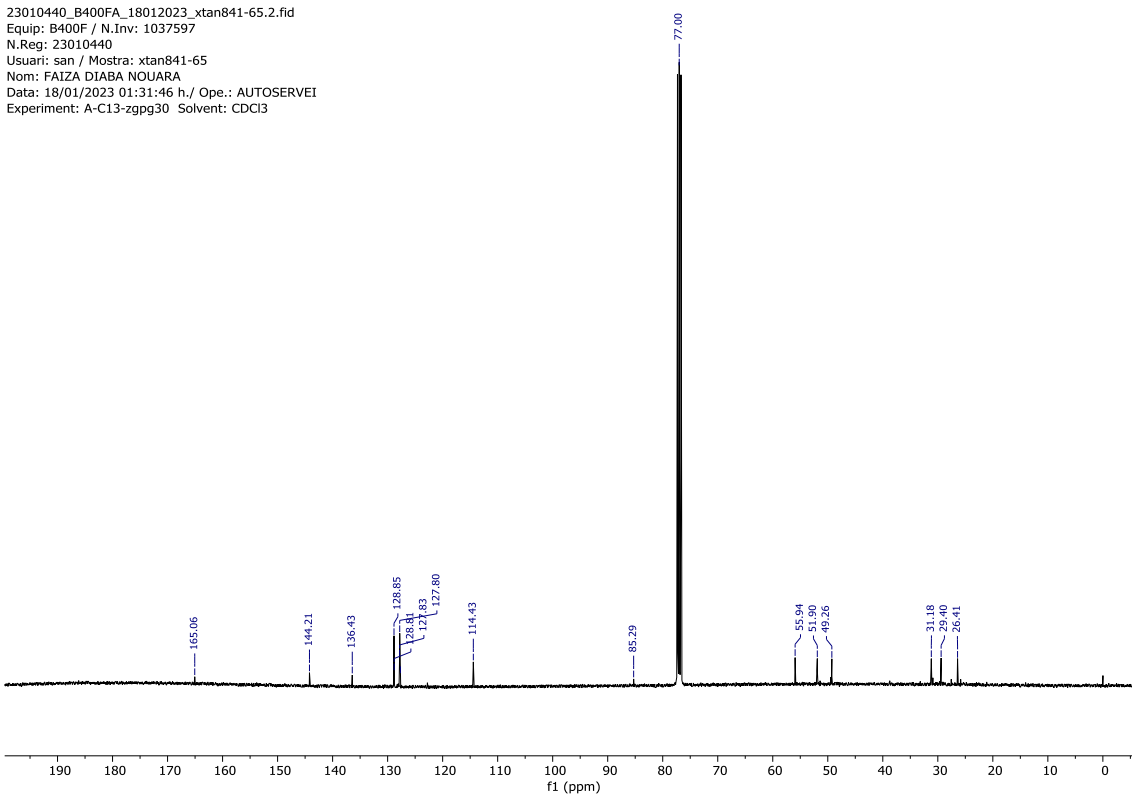

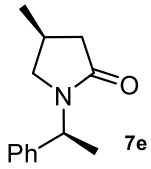

XGT704-9.1.fid  
 Equip: B400F / N.Inv: 1037597  
 N.Reg: 22090624  
 Usuari: san / Mostra: XGT704-9  
 Nom: GISELA TRENCHS MIR  
 Data: 22/09/2022 16:10:13 h./ Ope.: AUTOSERVEI  
 Experiment: A-H1-zg30 Solvent: CDCl3

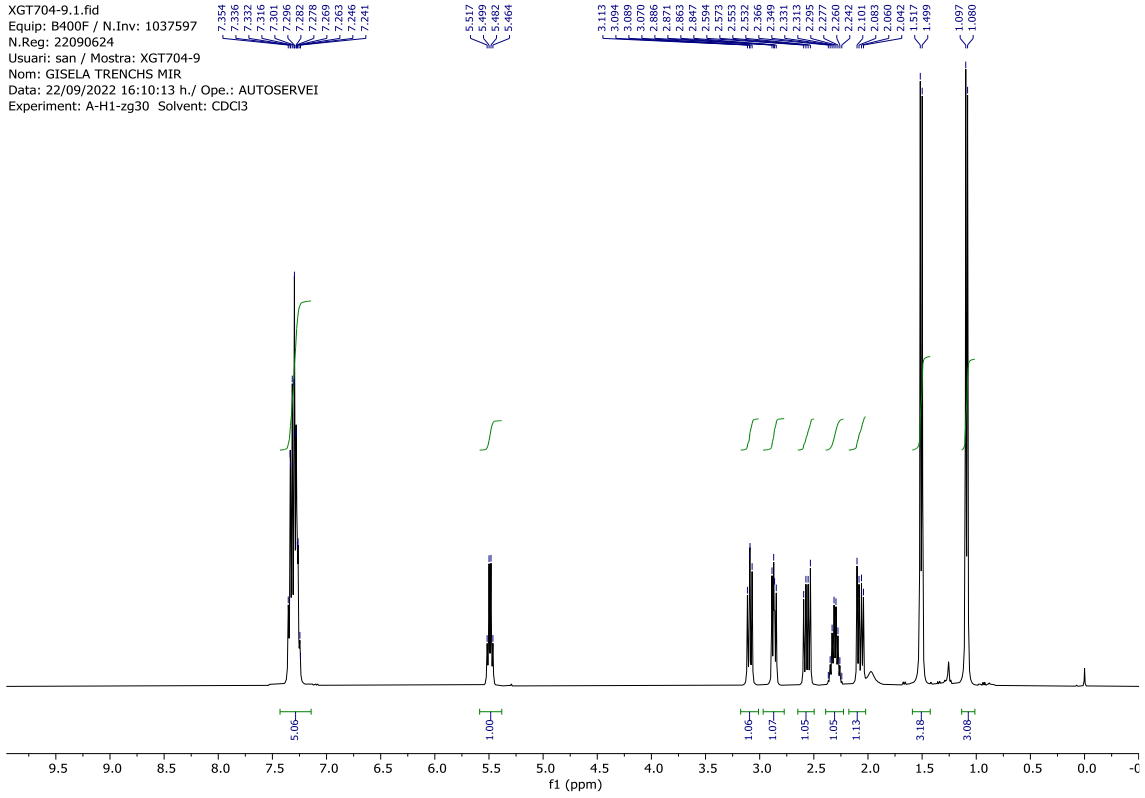

XGT704-9.2.fid  
 Equip: B400F / N.Inv: 1037597  
 N.Reg: 22090624  
 Usuari: san / Mostra: XGT704-9  
 Nom: GISELA TRENCHS MIR  
 Data: 23/09/2022 06:16:57 h./ Ope.: AUTOSERVEI  
 Experiment: A-C13-zpgg30 Solvent: CDCl3

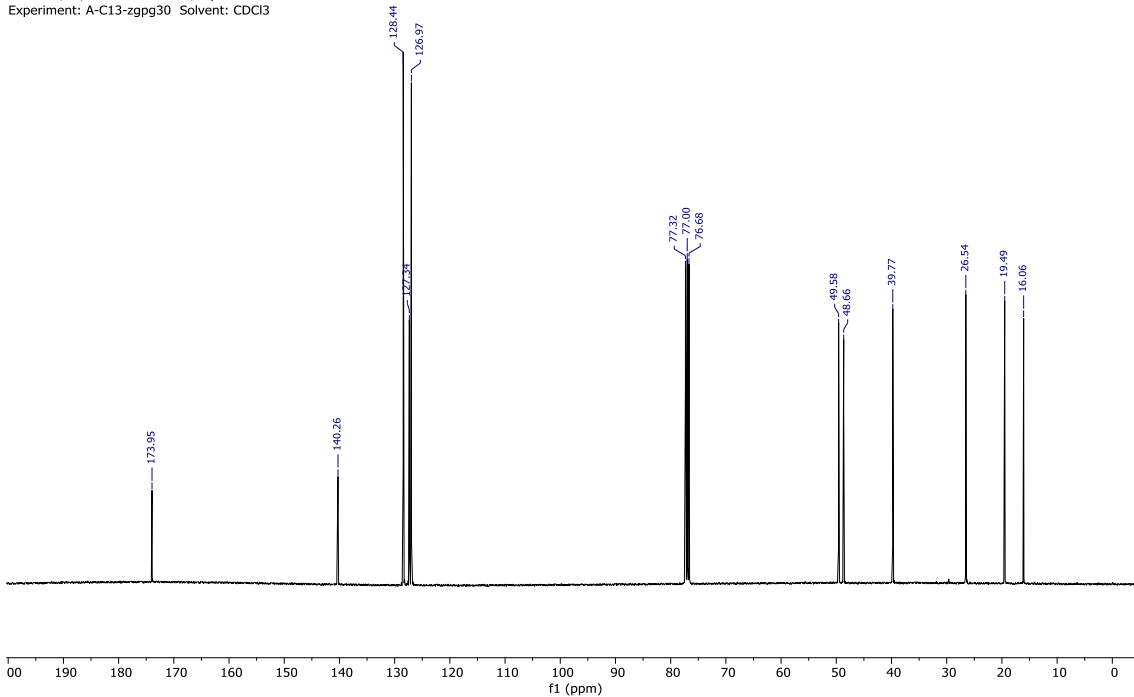





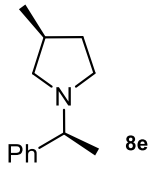

22100051\_B400FA\_05102022\_XGT713-5.fid  
 Equip: B400F / N.Inv: 1037597  
 N.Reg: 22100051  
 Usuari: san / Mostra: XGT713-5  
 Nom: GISELA TRENCHS MIR  
 Data: 04/10/2022 11:15:22 h./ Ope.: AUTOSERVEI  
 Experiment: A-H1-zg30 Solvent: CDCl3

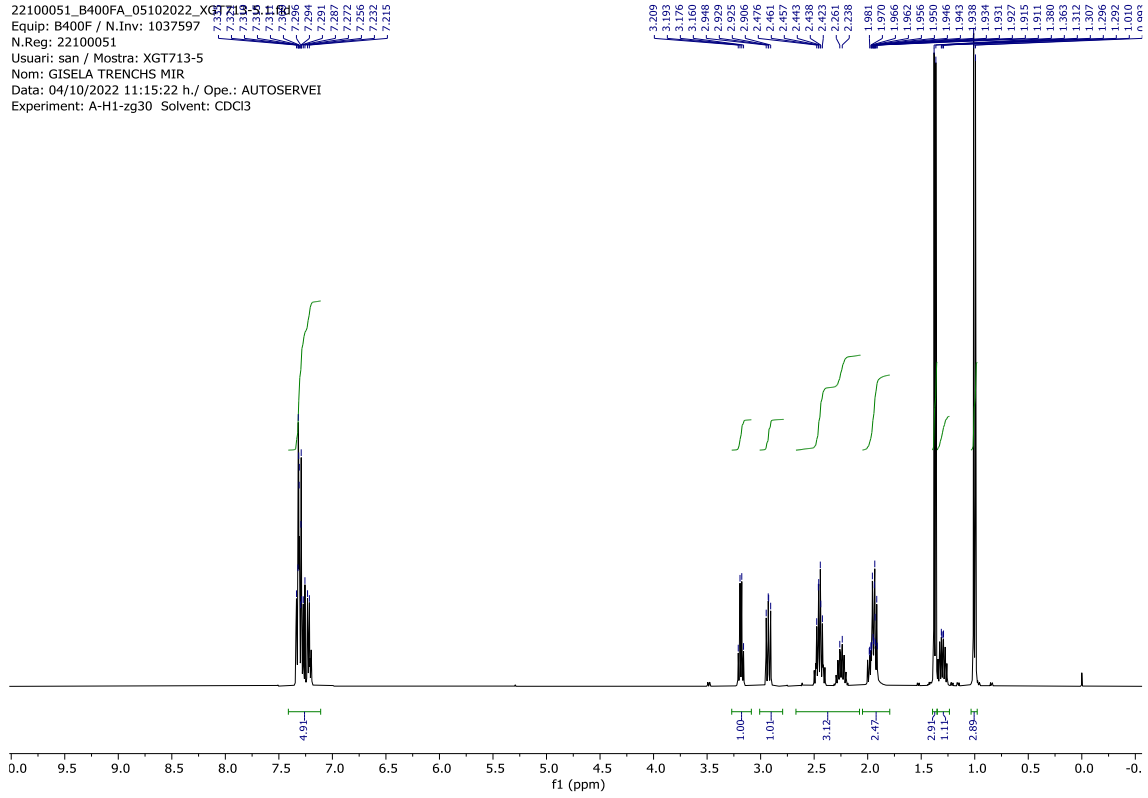

22100051\_B400FA\_05102022\_XGT713-5.2.fid  
 Equip: B400F / N.Inv: 1037597  
 N.Reg: 22100051  
 Usuari: san / Mostra: XGT713-5  
 Nom: GISELA TRENCHS MIR  
 Data: 04/10/2022 23:17:24 h./ Ope.: AUTOSERVEI  
 Experiment: A-C13-zgpg30 Solvent: CDCl3

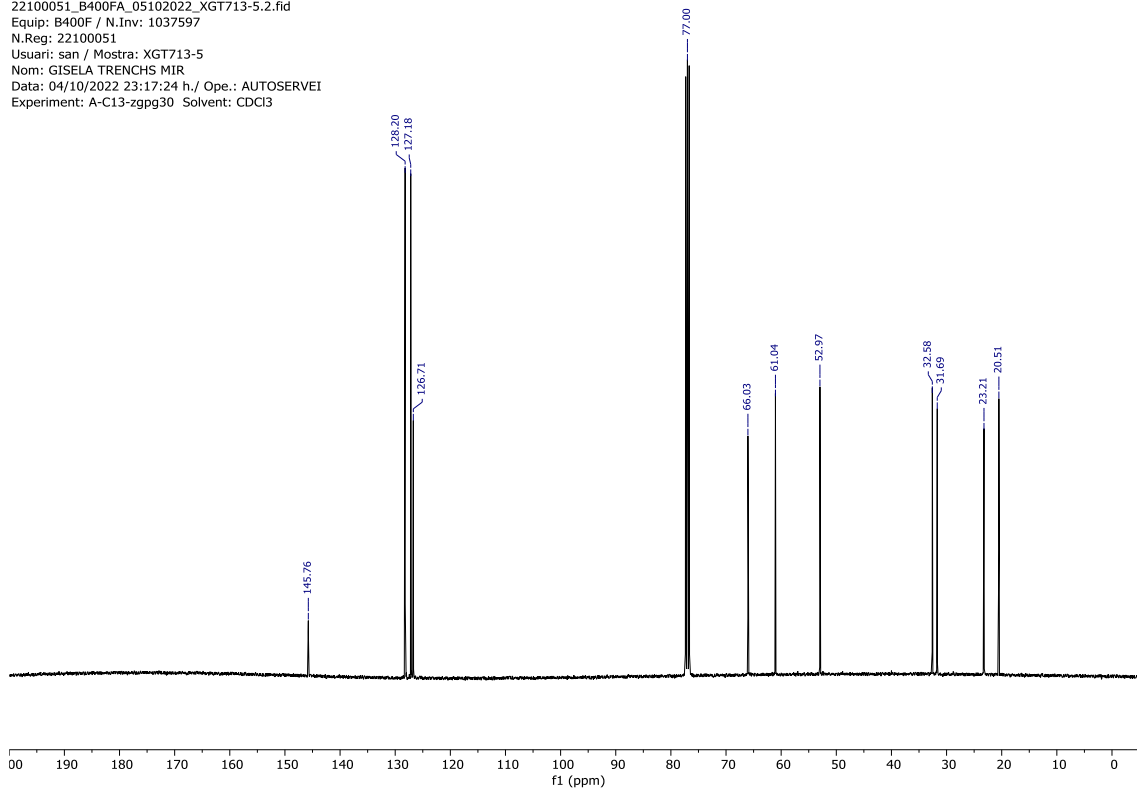

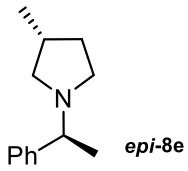

23070654\_B400FA\_21072023\_XGT938-10-B.1.fid  
 Equip: B400F / N.Inv: 1037597  
 N.Reg: 23070654  
 Usuari: san / Mostra: XGT938-10-B  
 Nom: GISELA TRENCHS MIR  
 Data: 21/07/2023 13:14:56 h./ Ope.: AUTOSERVEI  
 Experiment: A-H1-zg30 Solvent: CDCl3

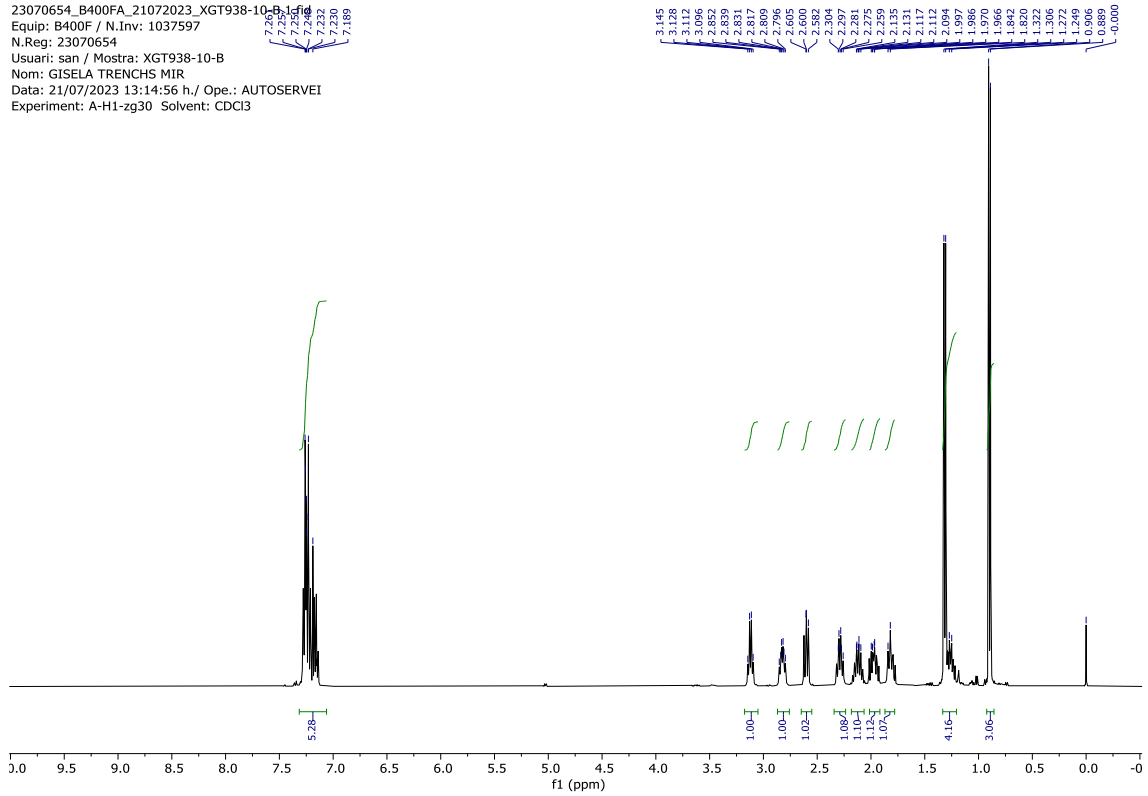

23070654\_B400FA\_21072023\_XGT938-10-B.2.fid  
 Equip: B400F / N.Inv: 1037597  
 N.Reg: 23070654  
 Usuari: san / Mostra: XGT938-10-B  
 Nom: GISELA TRENCHS MIR  
 Data: 21/07/2023 14:06:12 h./ Ope.: AUTOSERVEI  
 Experiment: A-C13-zpgg30 Solvent: CDCl3

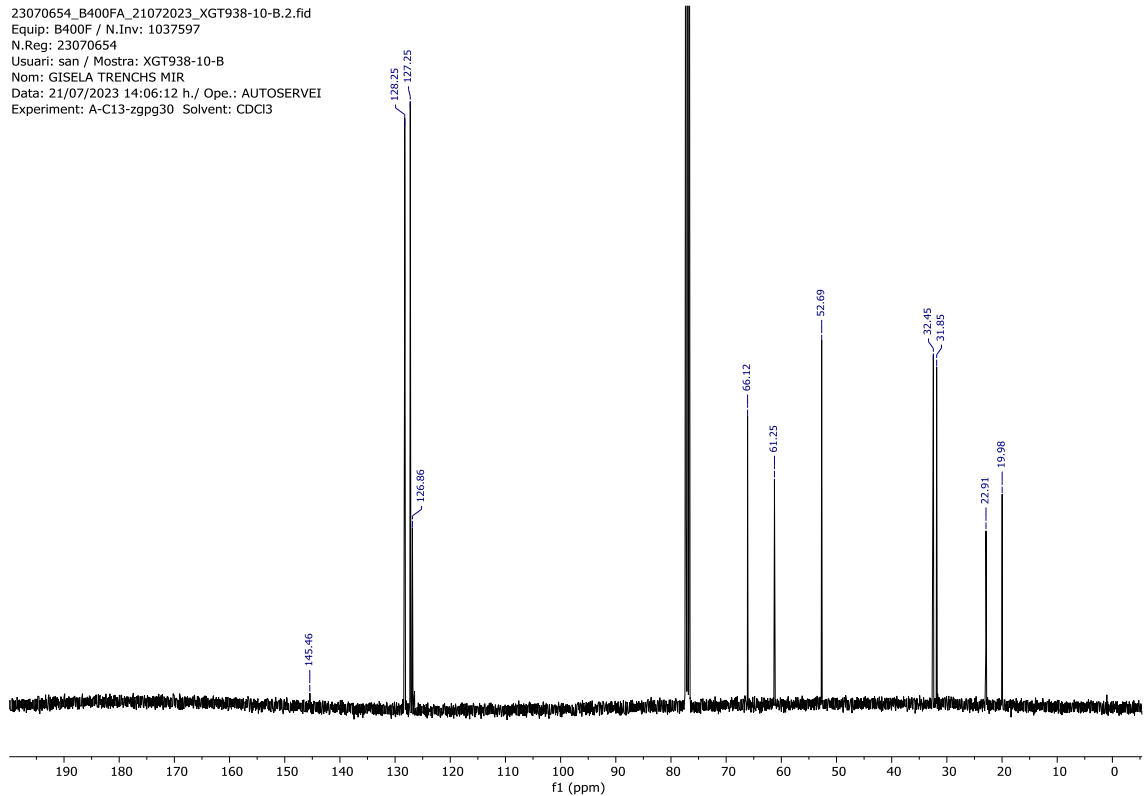

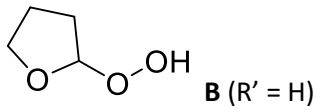

2919-2023\_B400FA\_12052023\_XTAN951-15.1.fid  
 Equip: B400F / N.Inv: 1037597  
 N.Reg: 2919/2023  
 Usuari: san / Mostra: XTAN951-15  
 Nom: FAIZA DIABA NOUARA  
 Data: 12/05/2023 12:32:34 h./ Ope.: servei Unitat RMN  
 Experiment: A-H1-zg30 Solvent: CDCl3

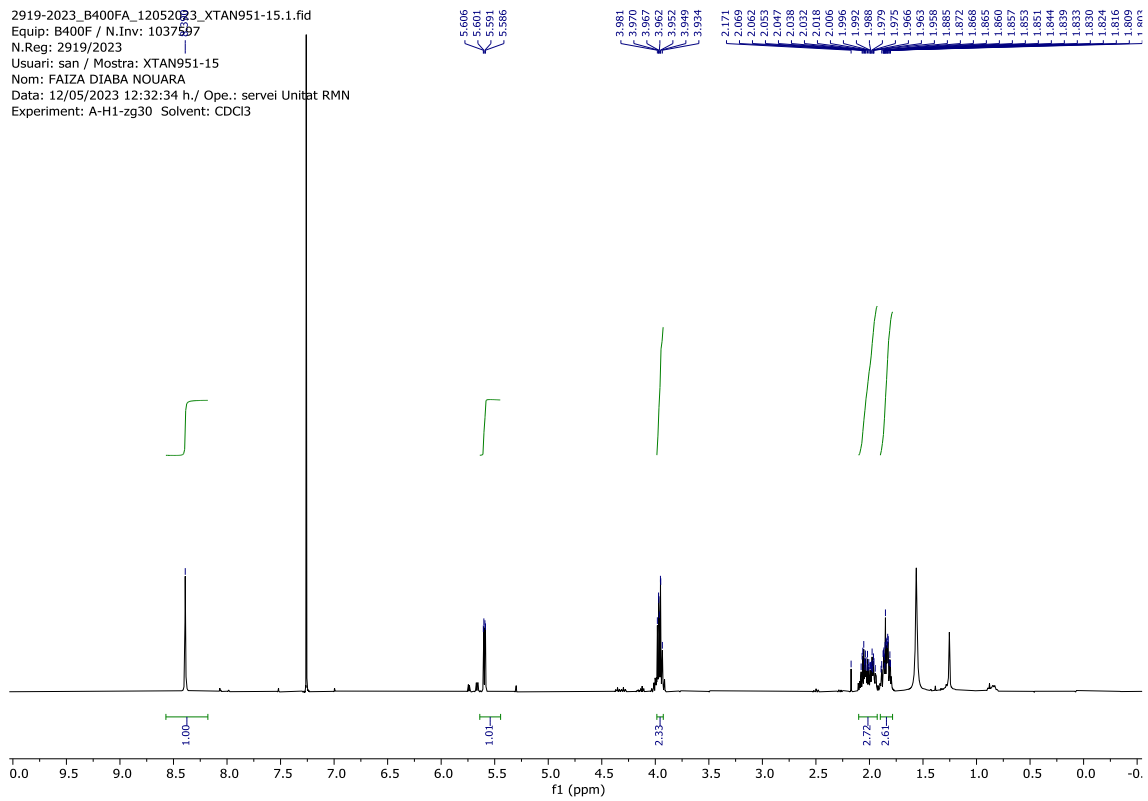

2919-2023\_B400FA\_12052023\_XTAN951-15.2.fid  
 Equip: B400F / N.Inv: 1037597  
 N.Reg: 2919/2023  
 Usuari: san / Mostra: XTAN951-15  
 Nom: FAIZA DIABA NOUARA  
 Data: 12/05/2023 12:32:34 h./ Ope.: servei Unitat RMN  
 Experiment: A-C13-zgpg30 Solvent: CDCl3

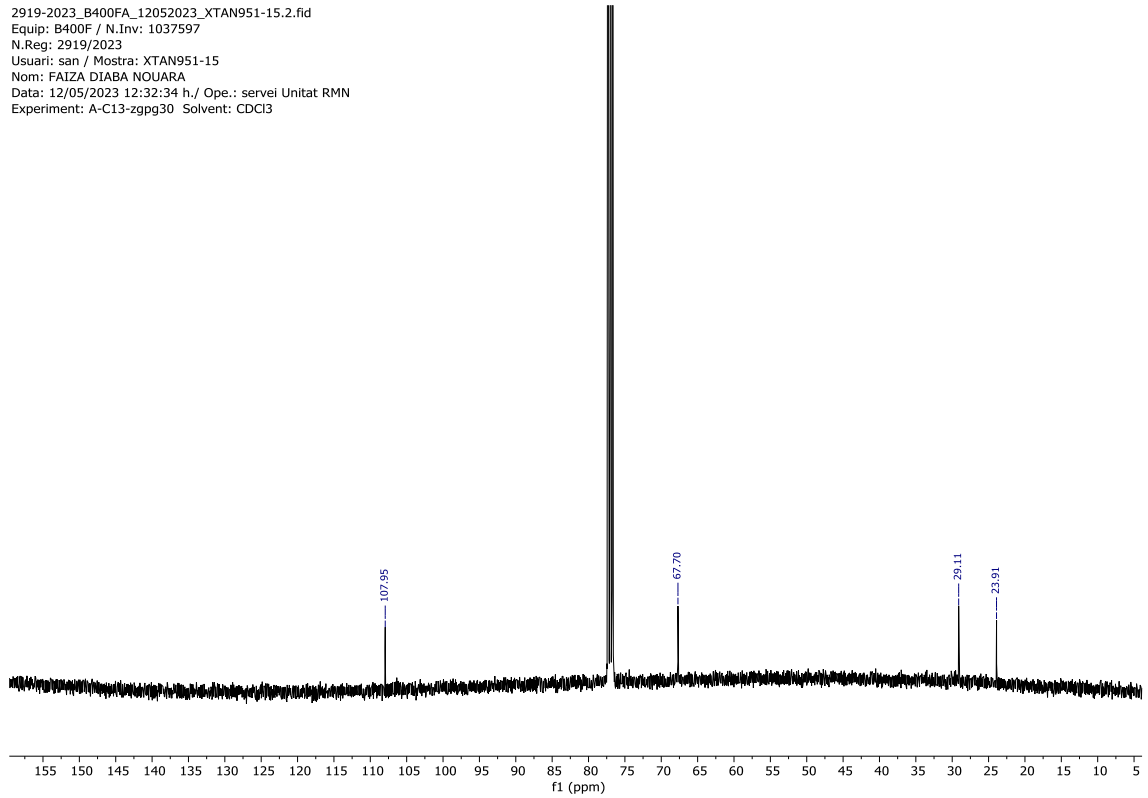

Supplement: d3ob01804k1.pdf [file d3ob01804k1.pdf]
